# Supplementary material for: Interfacial alloying between lead halide perovskite crystals and hybrid glasses
Source: Springer Nature journal article supplement (doi:10.1038/s41467-023-43247-6), 2023-11-22
Supplement: MOESM1 [file 41467_2023_43247_MOESM1_ESM.pdf]

**Supplementary Information**

**Interfacial alloying between lead halide perovskite crystals and  
hybrid glasses**

Li et al.

**This PDF file includes:**

Supplementary Table 1

Supplementary Figs.1 to 37

**Supplementary Table 1. Results of the extended X-ray absorption fine structure (EXAFS) fitting for (CsPbI<sub>3</sub>)<sub>0.40</sub>(a<sub>g</sub>ZIF-62)<sub>0.60</sub> composites before and after 350°C sintering for Zn K and Pb L<sub>3</sub> edge.**

| Name  | Coordination number (CN) | Bond length | Sintering | R-factor |
|-------|--------------------------|-------------|-----------|----------|
| Zn-N  | 5.07±0.26                | 1.99±0.004  | Before    | 0.007    |
| Zn-C  | 6.96±1.35                | 3.02±0.018  | Before    | 0.007    |
| Pb-O  | 3.27±0.35                | 2.46±0.007  | Before    | 0.005    |
| Pb-I  | 1.69±0.16                | 3.13±0.011  | Before    | 0.005    |
| Zn-N  | 5.04±0.31                | 1.98±0.005  | After     | 0.007    |
| Zn-C  | 4.59±1.10                | 2.99±0.020  | After     | 0.007    |
| Pb-I  | 6.80±1.23                | 3.12±0.042  | After     | 0.010    |
| Pb-Zn | 4.08±0.47                | 1.80±0.013  | After     | 0.010    |

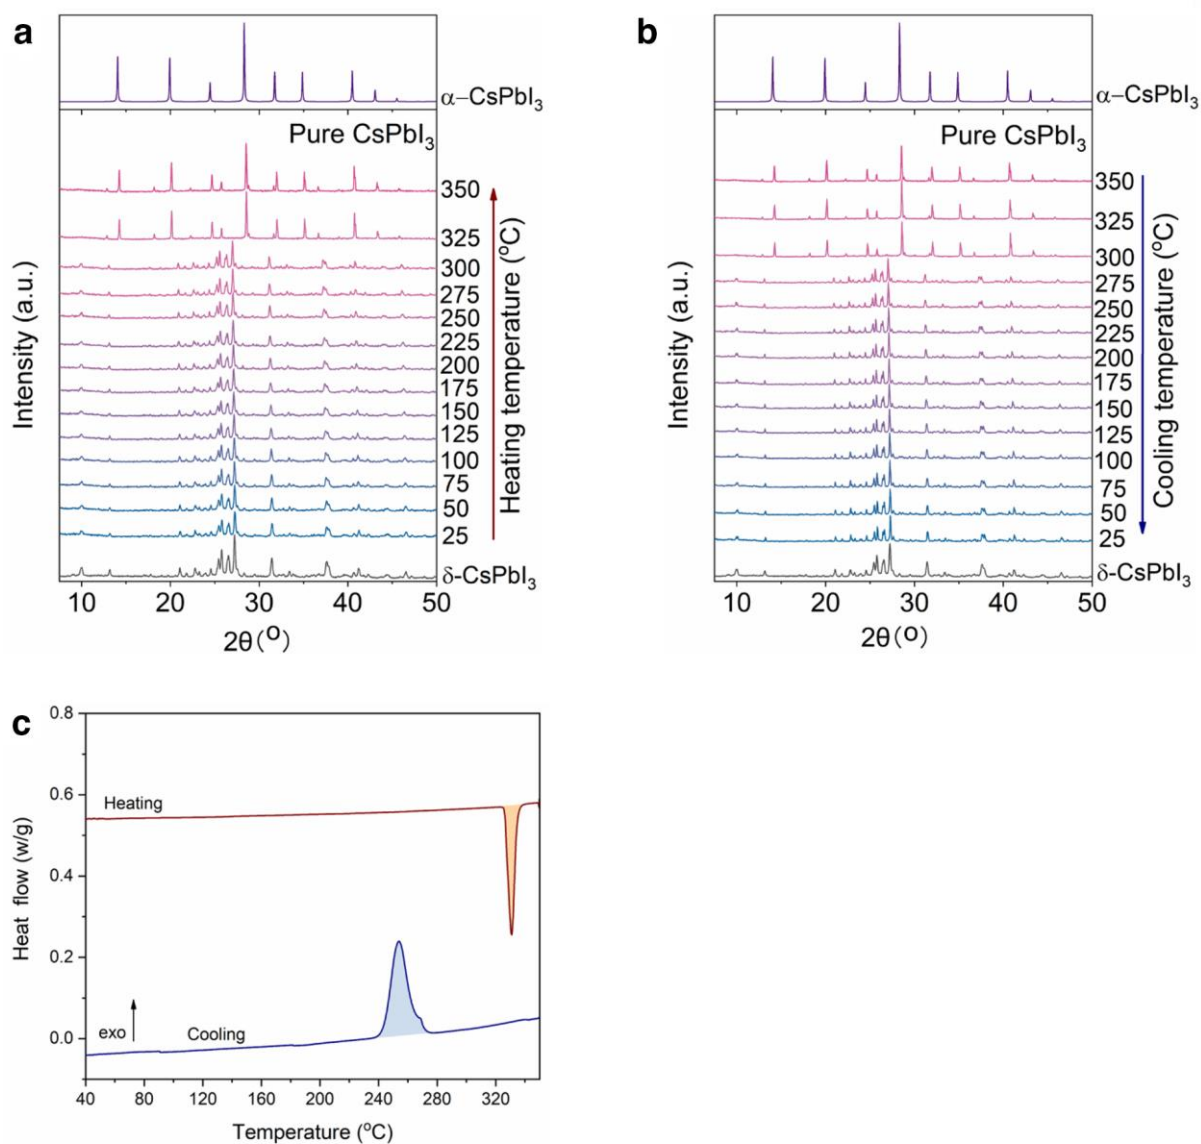

**Supplementary Fig. 1. Phase transition of the pure CsPbI<sub>3</sub>.** **a** *In-situ* XRD pattern for pure CsPbI<sub>3</sub> during the heating process. **b** *In-situ* XRD pattern for pure CsPbI<sub>3</sub> during the cooling process. **c** DSC results for pure CsPbI<sub>3</sub> for heating and cooling ramps. Data was collected under constant flowing nitrogen protection (20 mL/min). The temperature ramping rates were 20 and 10 °C/min during the heating and cooling process, respectively.

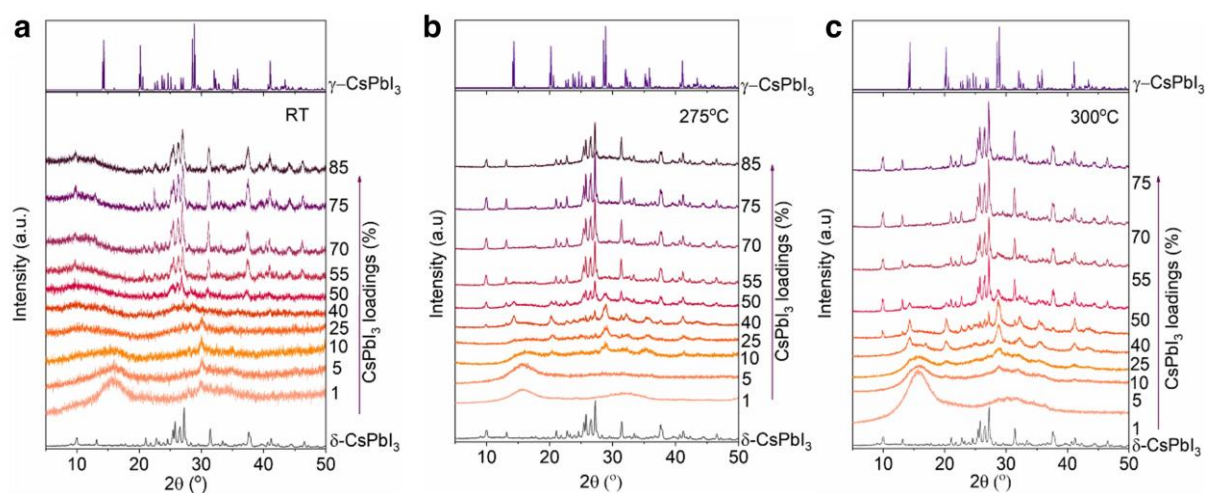

**Supplementary Fig. 2. Crystal structures of the composites with different components and sintered under different temperatures.** **a** *Ex-situ* XRD pattern of (CsPbI<sub>3</sub>) (a<sub>g</sub>ZIF-62) (X/Y), and (CsPbI<sub>3</sub>)<sub>X</sub>(a<sub>g</sub>ZIF-62)<sub>Y</sub> composites prepared at **b** 275 °C and **(c)** 300 °C sintering.

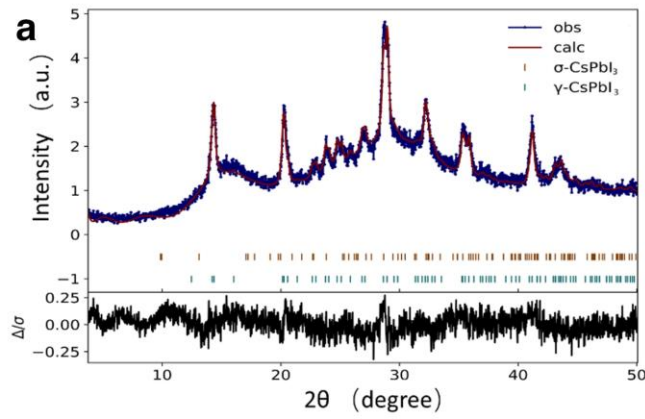

| Lattice parameters               | Lattice parameters reported in ref. | Lattice parameters                  | Lattice parameters reported in ref. |
|----------------------------------|-------------------------------------|-------------------------------------|-------------------------------------|
| a=10.3822 Å                      | a=10.4500(5) Å                      | a=8.6232 Å                          | a=8.6198(6) Å                       |
| b=4.8068 Å                       | b=4.7965(2) Å                       | b=8.8085 Å                          | b=8.8518(6) Å                       |
| c=17.7523 Å                      | c=17.7602(8) Å                      | c=12.4534 Å                         | c=12.5012(7) Å                      |
| α=90°                            | α=90 °                              | α=90°                               | α=90 °                              |
| β=90°                            | β=90 °                              | β=90°                               | β=90 °                              |
| γ=90°                            | γ=90 °                              | γ=90°                               | γ=90 °                              |
| V=885.929 Å <sup>3</sup>         | V=890.20(7) Å <sup>3</sup>          | V=945.920 Å <sup>3</sup>            | V=953.852(11) Å <sup>3</sup>        |
| Space group: <i>Pnma</i>         |                                     | Space group: <i>Pbnm</i>            |                                     |
| Crystal system: Orthorhombic (σ) |                                     | Crystal system: orthorhombic (γ)    |                                     |
| Weight fraction: 0 (sig: 0.0078) |                                     | Weight fraction: 100% (sig: 0.0078) |                                     |
| R <sub>wp</sub> =8.074%          |                                     |                                     |                                     |

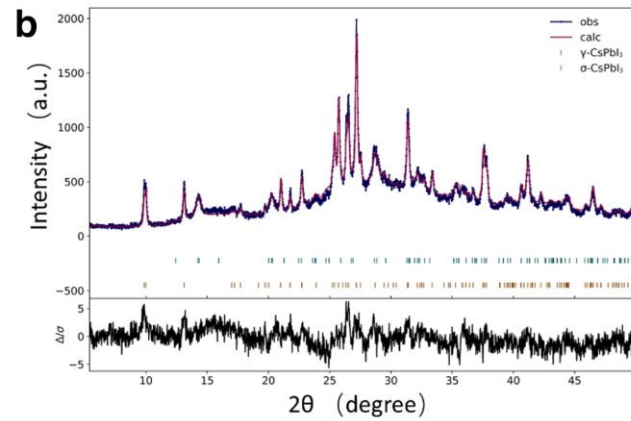

| Lattice parameters               | Lattice parameters reported in ref. | Lattice parameters               | Lattice parameters reported in ref. |
|----------------------------------|-------------------------------------|----------------------------------|-------------------------------------|
| a=10.4382 Å                      | a=10.4500(5) Å                      | a=8.7326 Å                       | a=8.6198(6) Å                       |
| b=4.7884 Å                       | b=4.7965(2) Å                       | b=8.8679 Å                       | b=8.8518(6) Å                       |
| c=17.7395 Å                      | c=17.7602(8) Å                      | c=12.3619 Å                      | c=12.5012(7) Å                      |
| α=90°                            | α=90 °                              | α=90°                            | α=90 °                              |
| β=90°                            | β=90 °                              | β=90°                            | β=90 °                              |
| γ=90°                            | γ=90 °                              | γ=90°                            | γ=90 °                              |
| V=888.665 Å <sup>3</sup>         | V=890.20(7) Å <sup>3</sup>          | V=957.306 Å <sup>3</sup>         | V=953.852(11) Å <sup>3</sup>        |
| Space group: <i>Pnma</i>         |                                     | Space group: <i>Pbnm</i>         |                                     |
| Crystal system: Orthorhombic (σ) |                                     | Crystal system: orthorhombic (γ) |                                     |
| Weight faction: 71.31% (sig: 0)  |                                     | Weight faction: 28.69% (sig: 0)  |                                     |
| R <sub>wp</sub> =9.171%          |                                     |                                  |                                     |

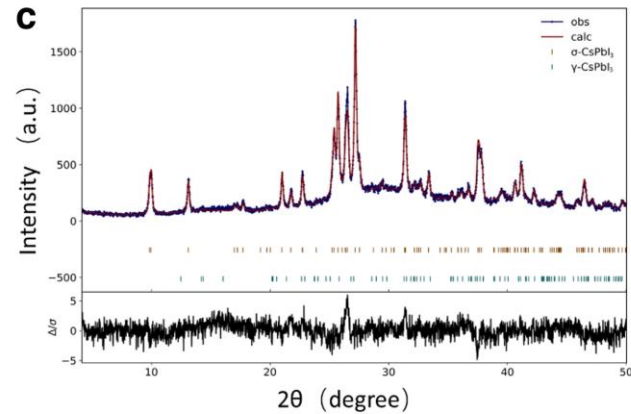

| Lattice parameters               | Lattice parameters reported in ref. | Lattice parameters               | Lattice parameters reported in ref. |
|----------------------------------|-------------------------------------|----------------------------------|-------------------------------------|
| a=10.4493 Å                      | a=10.4500(5) Å                      | a=8.6447 Å                       | a=8.6198(6) Å                       |
| b=4.7966 Å                       | b=4.7965(2) Å                       | b=8.8178 Å                       | b=8.8518(6) Å                       |
| c=17.7603 Å                      | c=17.7602(8) Å                      | c=12.5002 Å                      | c=12.5012(7) Å                      |
| α=90°                            | α=90 °                              | α=90°                            | α=90 °                              |
| β=90°                            | β=90 °                              | β=90°                            | β=90 °                              |
| γ=90°                            | γ=90 °                              | γ=90°                            | γ=90 °                              |
| V=890.172 Å³                     | V=890.20(7) Å³                      | V=952.857 Å³                     | V=953.852(11) Å³                    |
| Space group: <i>Pnma</i>         |                                     | Space group: <i>Pbnm</i>         |                                     |
| Crystal system: Orthorhombic (σ) |                                     | Crystal system: orthorhombic (γ) |                                     |
| Weight faction: 97.63% (sig: 0)  |                                     | Weight faction: 2.37% (sig: 0)   |                                     |
| R <sub>wp</sub> =8.612%          |                                     |                                  |                                     |

**Supplementary Fig. 3. Examples of identifying the proportions of various CsPbI<sub>3</sub> phases within composites using XRD refinement.** **a** Rietveld refinement of powder XRD pattern of (CsPbI<sub>3</sub>)<sub>0.25</sub>(agZIF-62)<sub>0.75</sub> composites sintering at 350 °C, **b** (CsPbI<sub>3</sub>)<sub>0.5</sub>(agZIF-62)<sub>0.5</sub> composites prepared at 300 °C and **c** (CsPbI<sub>3</sub>)<sub>0.70</sub>(agZIF-62)<sub>0.30</sub> composites sintering at 275°C.

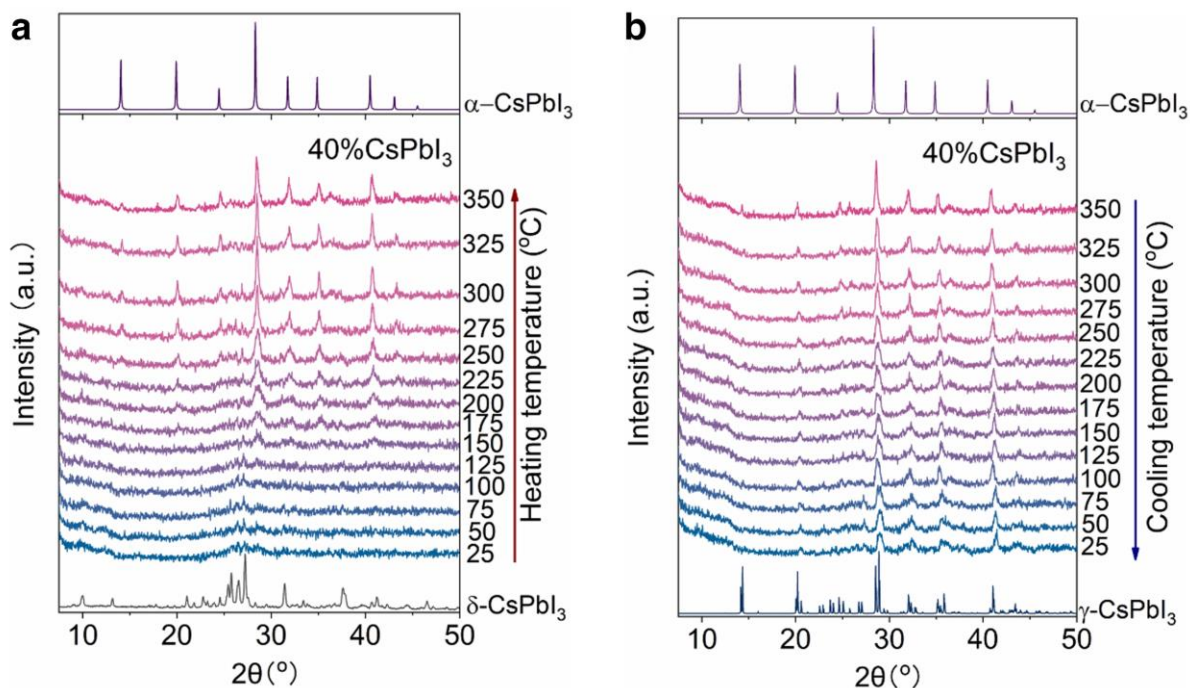

**Supplementary Fig. 4.** **a** *In-situ* XRD pattern of (CsPbI<sub>3</sub>)<sub>0.4</sub>(a<sub>g</sub>ZIF-62)<sub>0.6</sub> heated from 25 °C to 350 °C and **b** corresponding cooling down process. The temperature ramp is 20 °C/min under the protection of N<sub>2</sub>. The reference XRD patterns of α-, γ- and δ-CsPbI<sub>3</sub> are retrieved from ref<sup>1</sup>. The intermediate β-phase was not resolved using our benchtop XRD instrument, due to resolution limits. During the cooling ramp, the perovskite gradually lowered its symmetry, resulting in the formation of the orthorhombic γ-phase upon returning to room temperature.



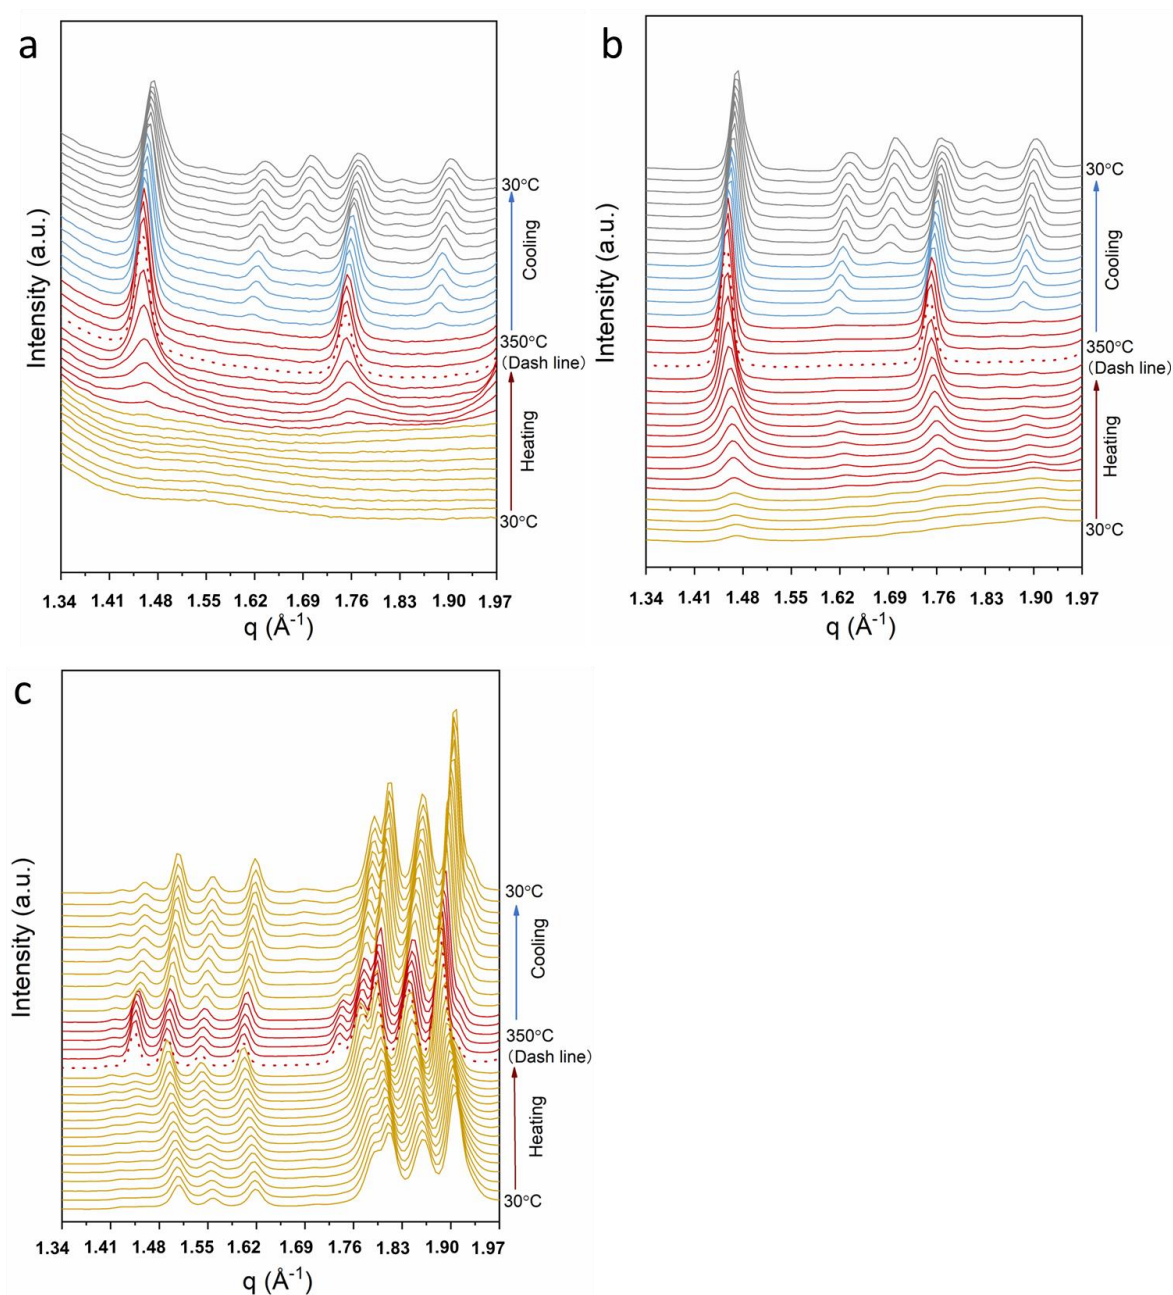

**Supplementary Fig. 5. High resolution *in situ* synchrotron powder XRD for different samples during sintering and quenching. The dominating CsPbI<sub>3</sub> phases are color-coded as:  $\delta$  (yellow),  $\alpha$  (red),  $\beta$  (blue) and  $\gamma$  (grey). a (CsPbI<sub>3</sub>)(a<sub>9</sub>ZIF-62)(5/95), b (CsPbI<sub>3</sub>)(a<sub>9</sub>ZIF-62)(40/60) and c (CsPbI<sub>3</sub>)(a<sub>9</sub>ZIF-62)(55/45).**

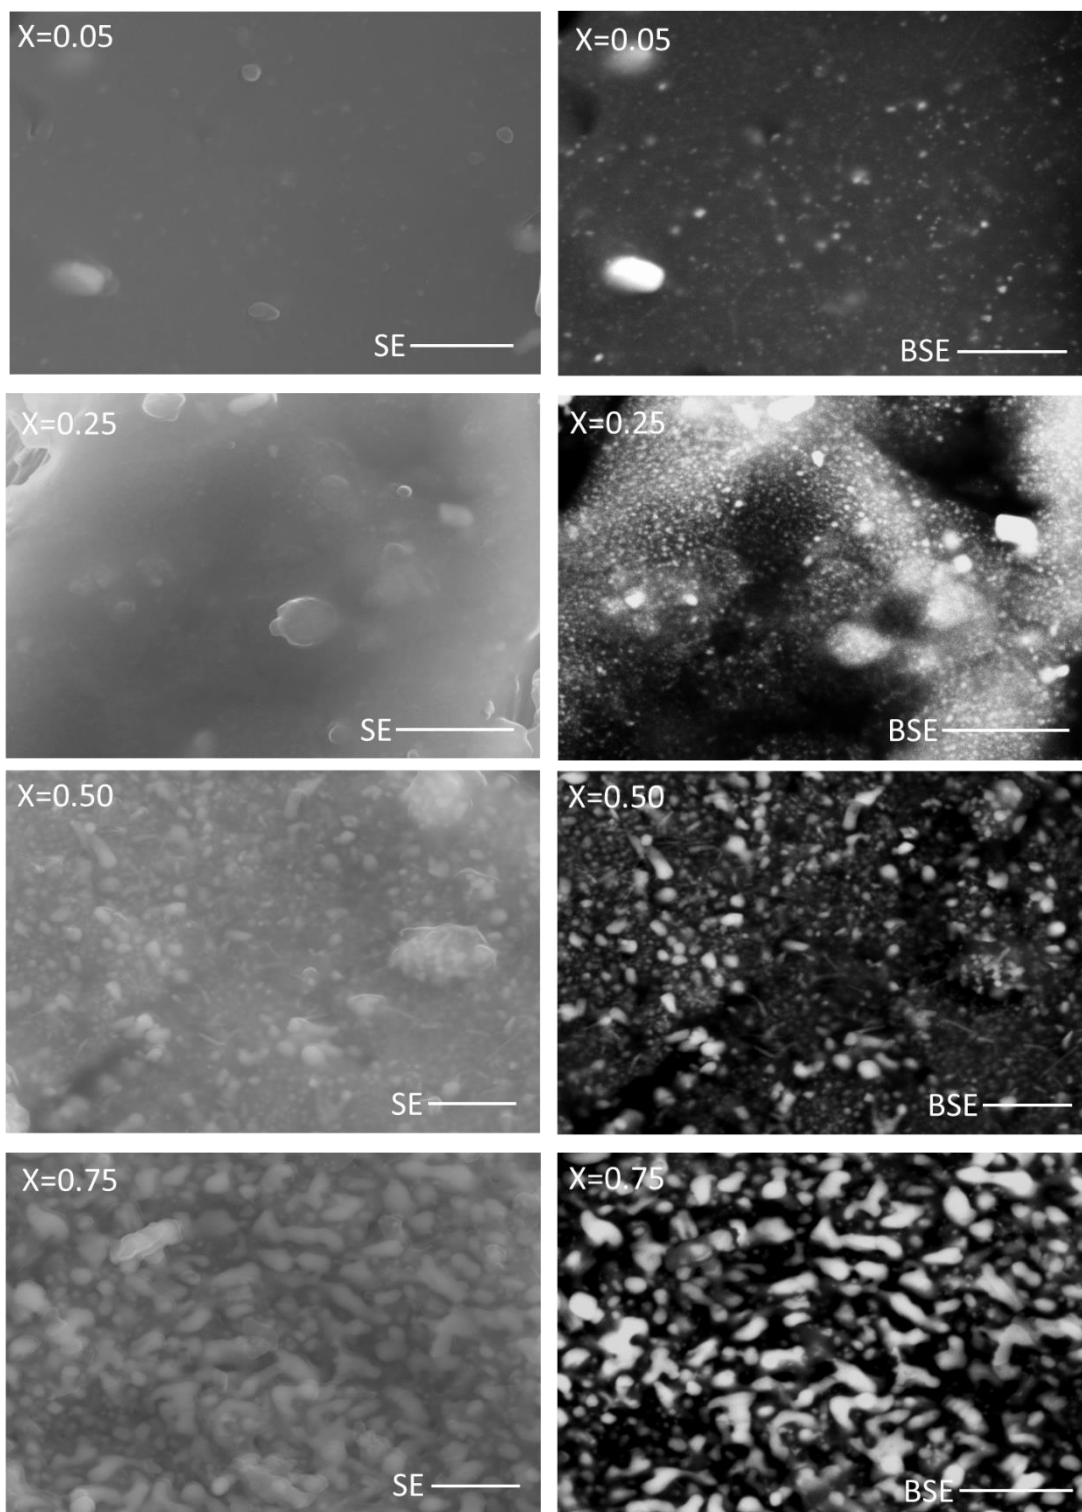

**Supplementary Fig. 6. SEM secondary electron image (SE, left) and backscattering image (BSE, right) of  $(\text{CsPbI}_3)_x(\text{agZIF-62})_y$  composites sintered at 350 °C. The scale bar is 1  $\mu\text{m}$ .**



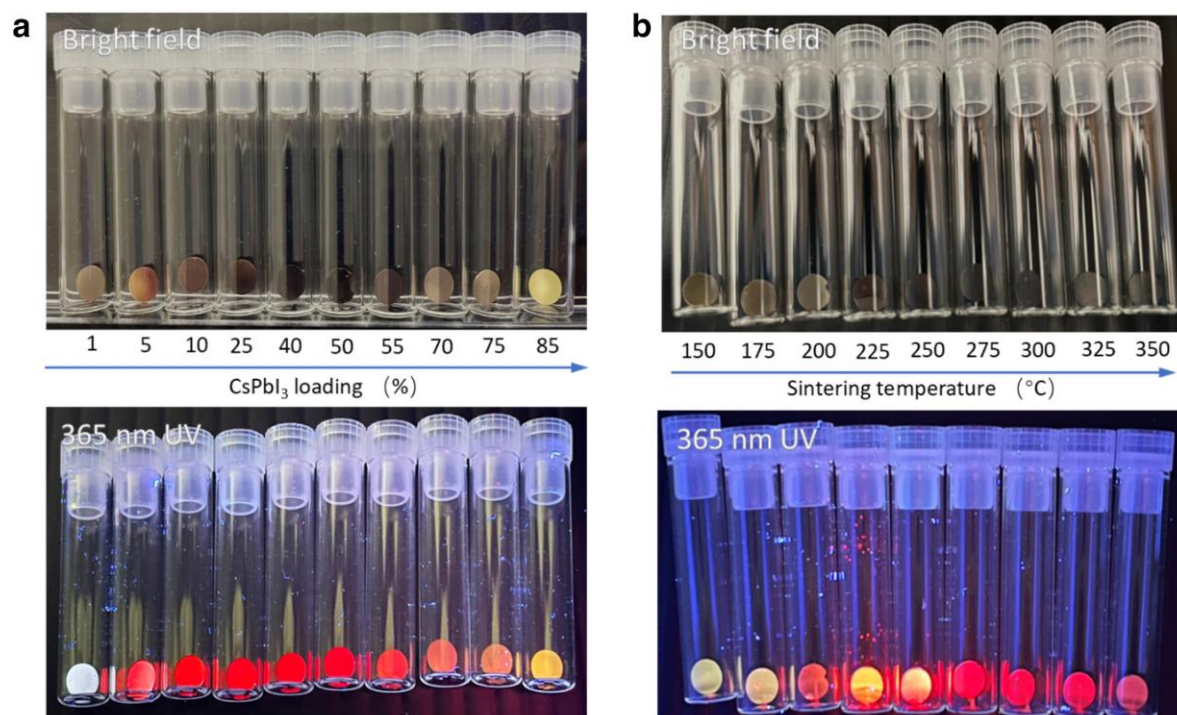

**Supplementary Fig. 7. PL emission of the composites.** **a** Optical images of the (CsPbI<sub>3</sub>)<sub>x</sub>(agZIF-62)<sub>y</sub> composites sintering at 275 °C with different CsPbI<sub>3</sub> components and **b** (CsPbI<sub>3</sub>)<sub>0.25</sub>(agZIF-62)<sub>0.75</sub> composites with various sintering temperatures.

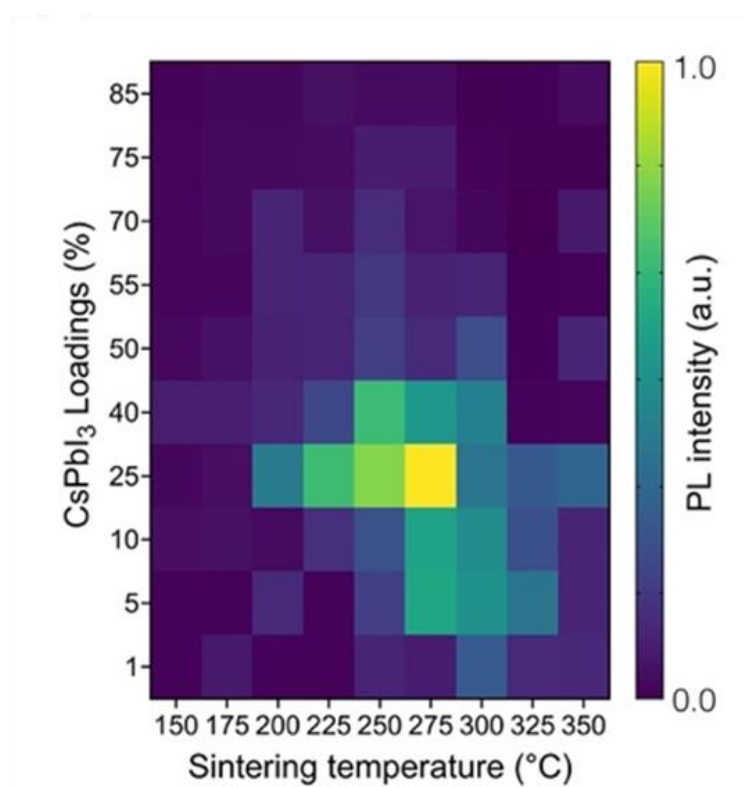

**Supplementary Fig. 8. Relative PL intensity of different  $(\text{CsPbI}_3)_x(\text{agZIF-62})_y$  composites.**

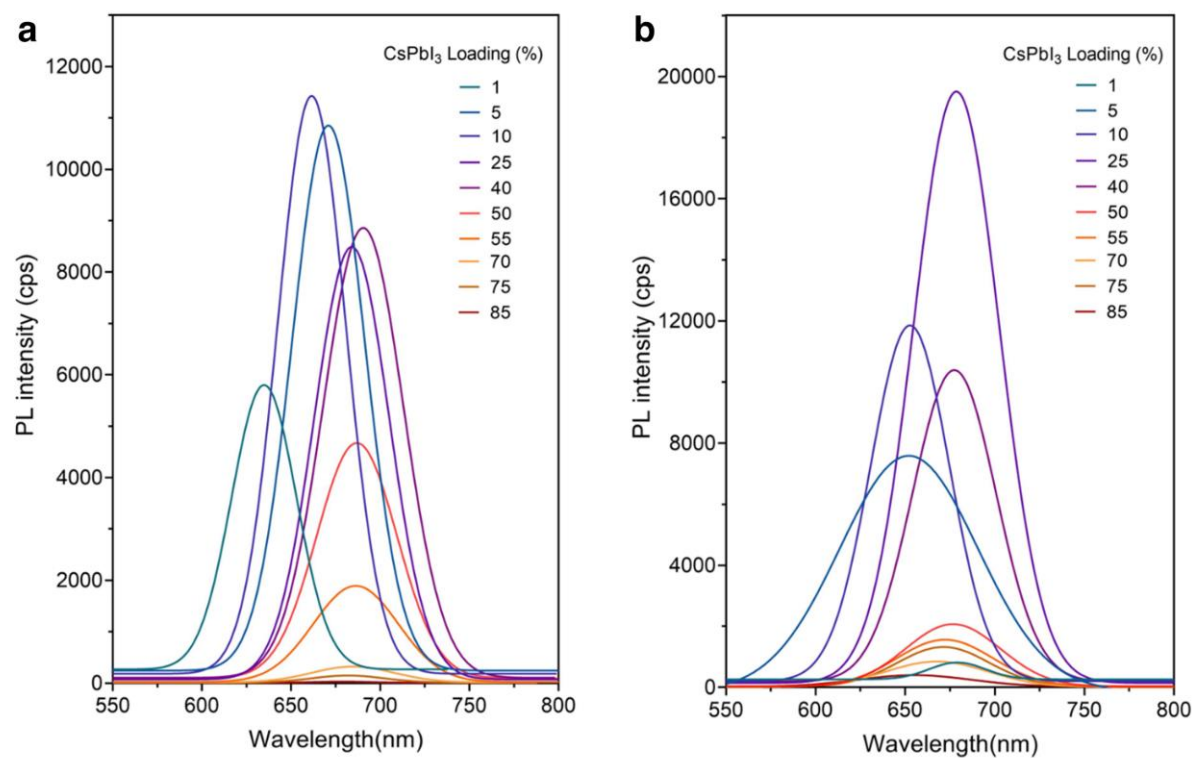

**Supplementary Fig. 9. PL profiles of different CsPbI<sub>3</sub> loading samples sintered at a 300°C and b 275°C.**

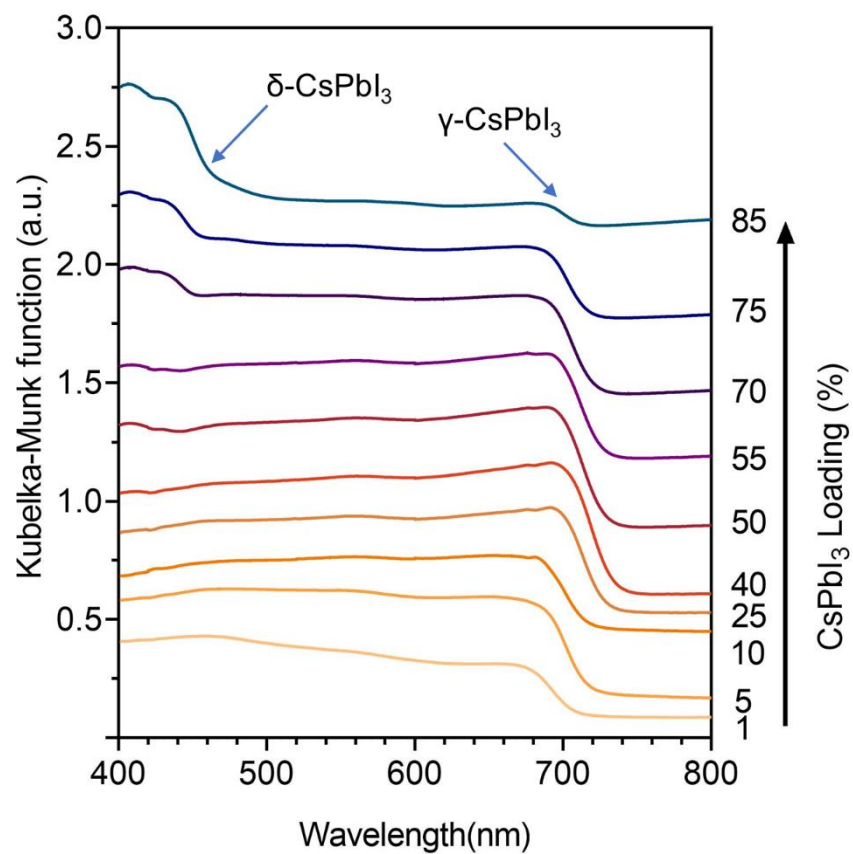

**Supplementary Fig. 10.** UV-Vis absorption spectra for different  $\text{CsPbI}_3$  percentages composites sintered at 300 °C.

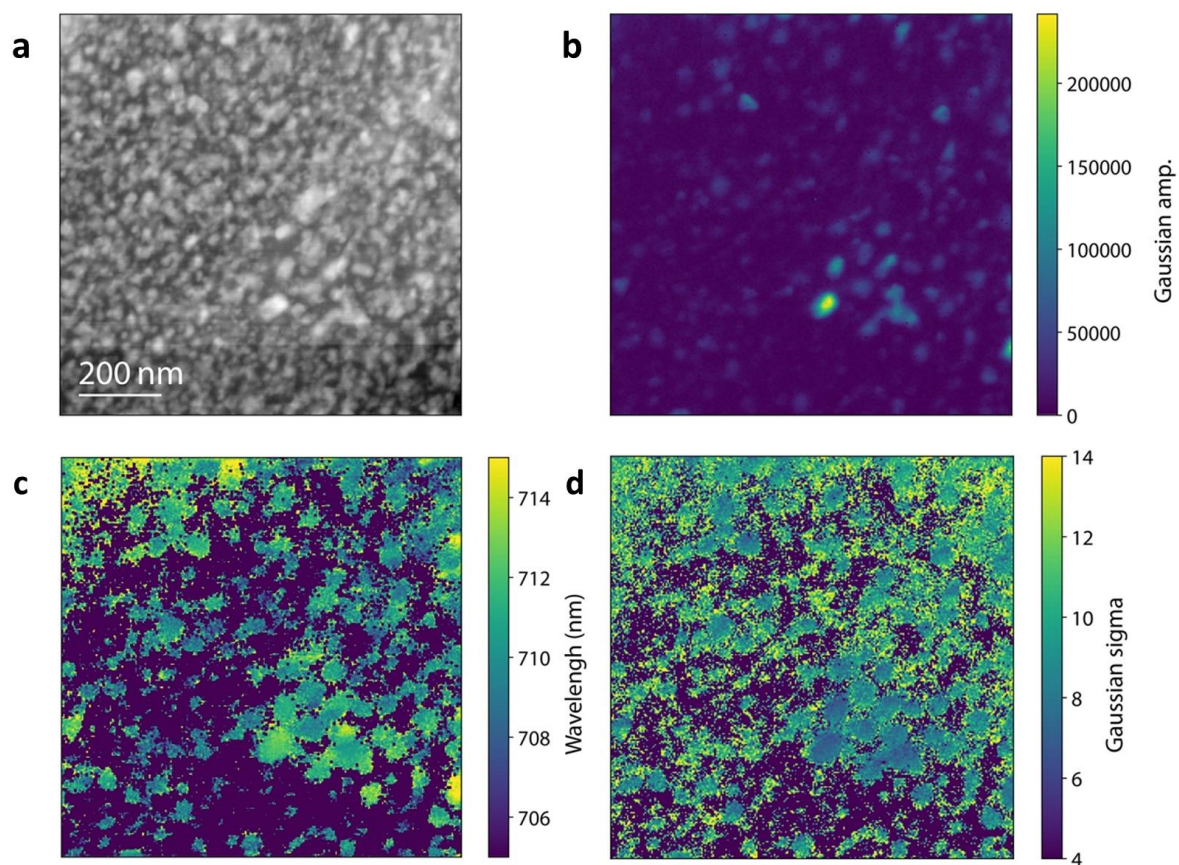

**Supplementary Fig. 11. Cathodoluminescence (CL)-STEM characterisation of the  $(\text{CsPbI}_3)_{0.40}(\text{agZIF-62})_{0.60}$  composites sintered at 350 °C and thinned with FIB-SEM. **a** ADF-STEM image. **b** Mapping of the Gaussian fitted CL peak intensity. **c** Mapping of the Gaussian fitted CL peak position values and **d** Gaussian fitted  $\sigma$  (nm) values.**

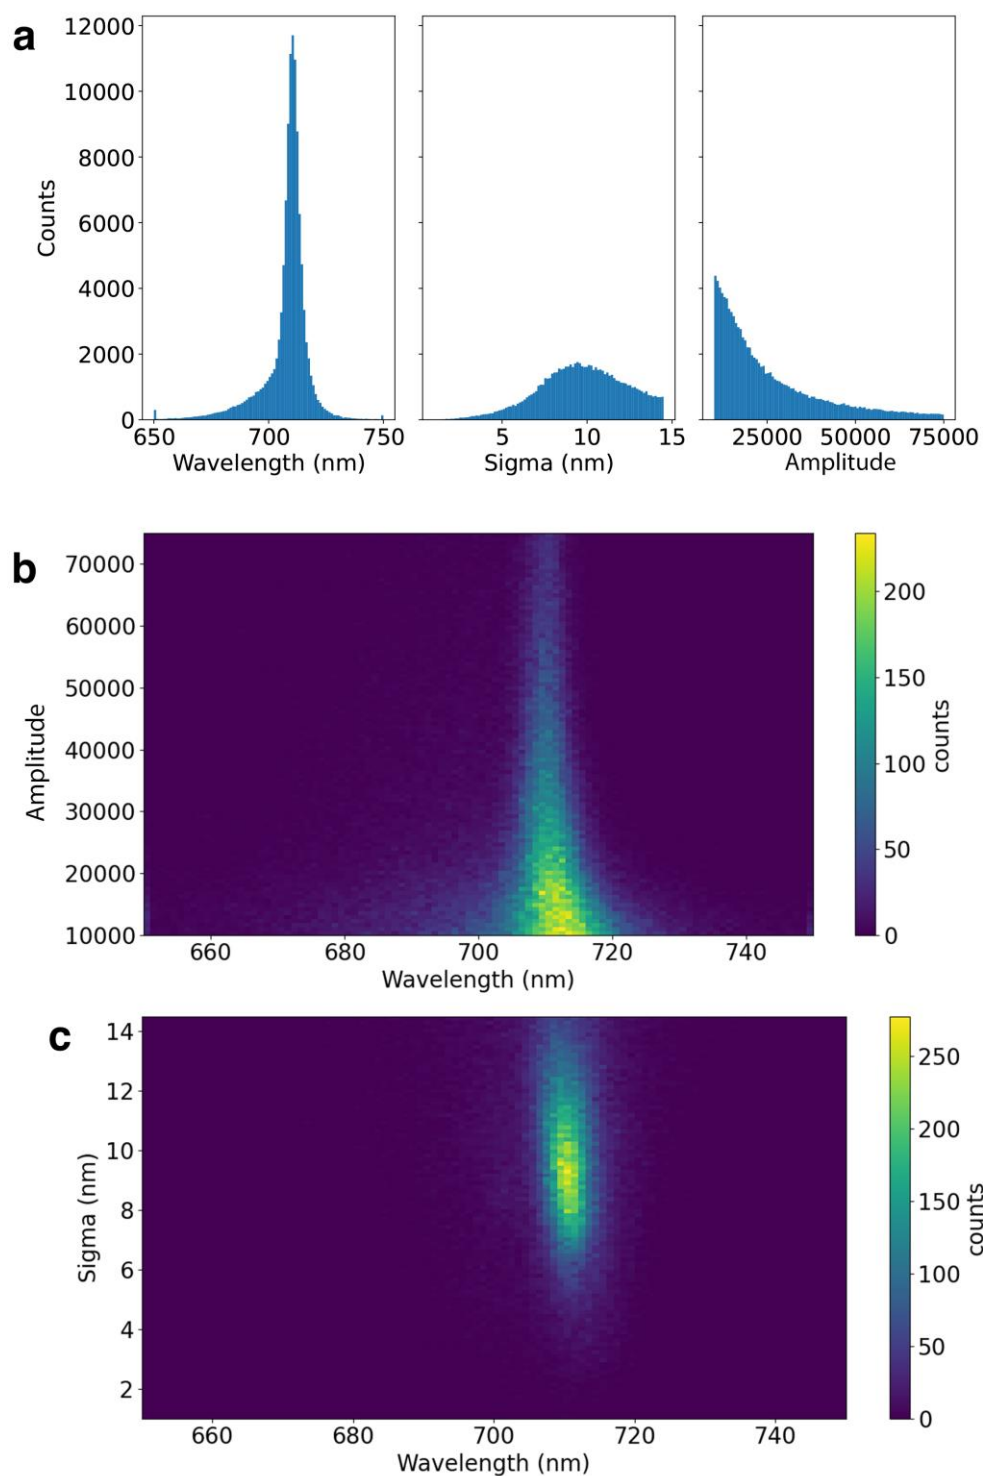

**Supplementary Fig. 12. CL-STEM characterisation of the  $(\text{CsPbI}_3)_{0.1}(\text{agZIF-62})_{0.9}$  composites sintered at 350 °C.** CL data cubes have been acquired from a total project area of  $6.9 \mu\text{m}^2$ . A one Gaussian model was fitted to each spectrum. **a** Histograms of the fitted coefficients across the whole measured area: Gaussian peak center, sigma and amplitude. **b, c** 2D histogram of the amplitude versus wavelength and sigma versus wavelength shows that correlations exist. Lower wavelength peaks are associated to higher intensities.



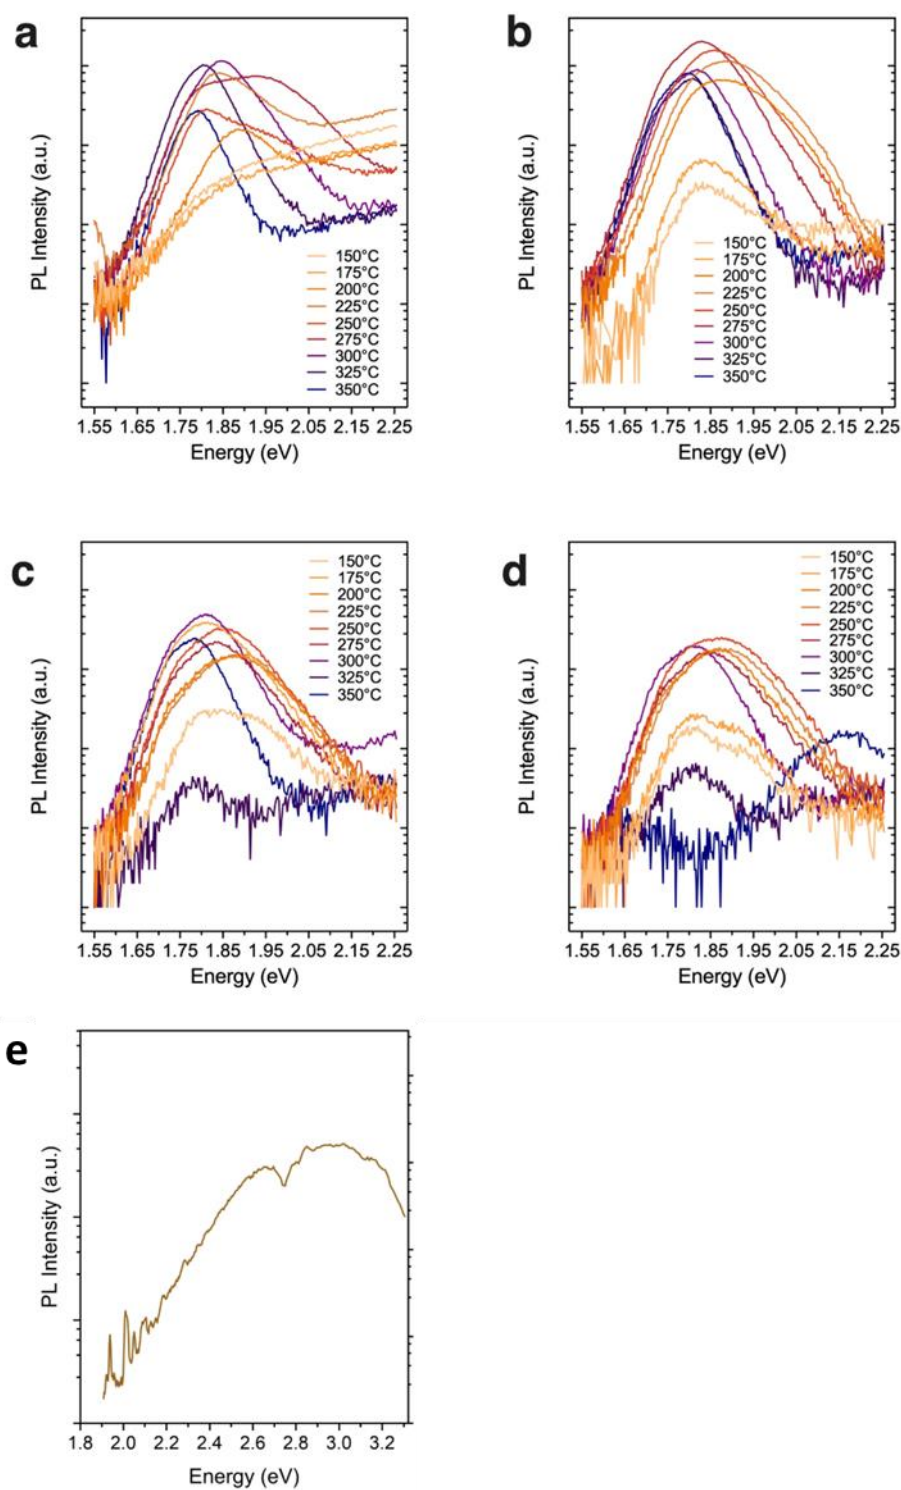

**Supplementary Fig. 13.** PL spectra shown in log scale for **a**  $(\text{CsPbI}_3)_{0.05}(\text{a-ZIF-62})_{0.95}$  composite, **b**  $(\text{CsPbI}_3)_{0.25}(\text{a-ZIF-62})_{0.75}$  composite, **c**  $(\text{CsPbI}_3)_{0.50}(\text{a-ZIF-62})_{0.50}$  composite, **d**  $(\text{CsPbI}_3)_{0.55}(\text{a-ZIF-62})_{0.45}$  composite and **e** pure  $\text{a-ZIF-62}$ .

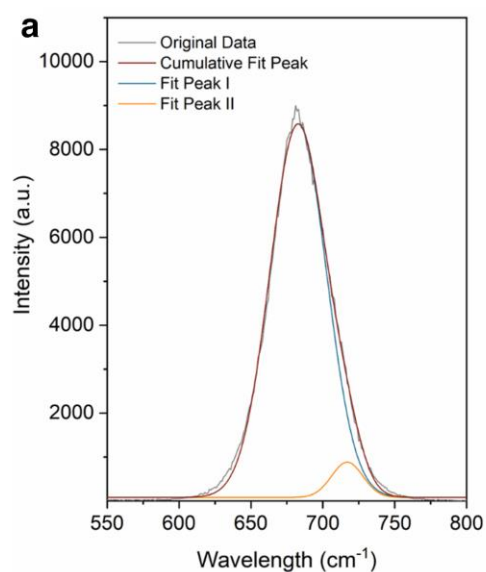

**b**

| Model           | Gauss                                                                       |                        |
|-----------------|-----------------------------------------------------------------------------|------------------------|
| Equation        | $y = y_0 + (A/(w \cdot \sqrt{\pi/2})) \cdot \exp(-2 \cdot ((x - x_c)/w)^2)$ |                        |
| Plot            | Peak I                                                                      | Peak II                |
| $y_0$           | $81.13 \pm 9.77$                                                            | $81.13 \pm 9.77$       |
| $x_c$           | $682.82 \pm 0.20$                                                           | $716.94 \pm 0.97$      |
| $w$             | $39.27 \pm 0.33$                                                            | $21.78 \pm 1.75$       |
| $A$             | $418305.79 \pm 3918.98$                                                     | $21896.09 \pm 3476.46$ |
| Reduced Chi-Sqr | 13025.42                                                                    |                        |
| R-Square (COD)  | 0.998                                                                       |                        |
| Adj. R-Square   | 0.998                                                                       |                        |

**Supplementary Fig. 14. Representative PL fitting with two-Gaussian function.** **a** PL curve of (CsPbI<sub>3</sub>)<sub>0.25</sub>(agZIF-62)<sub>0.75</sub> composite sintering at 300 °C fitted by two peaks Gaussian fits, the peaks were noted as Peak I and Peak II. **b** The summary of fitting results and peak parameters. Peak I represents the high energy peak and the Peak II represents the low energy peak.

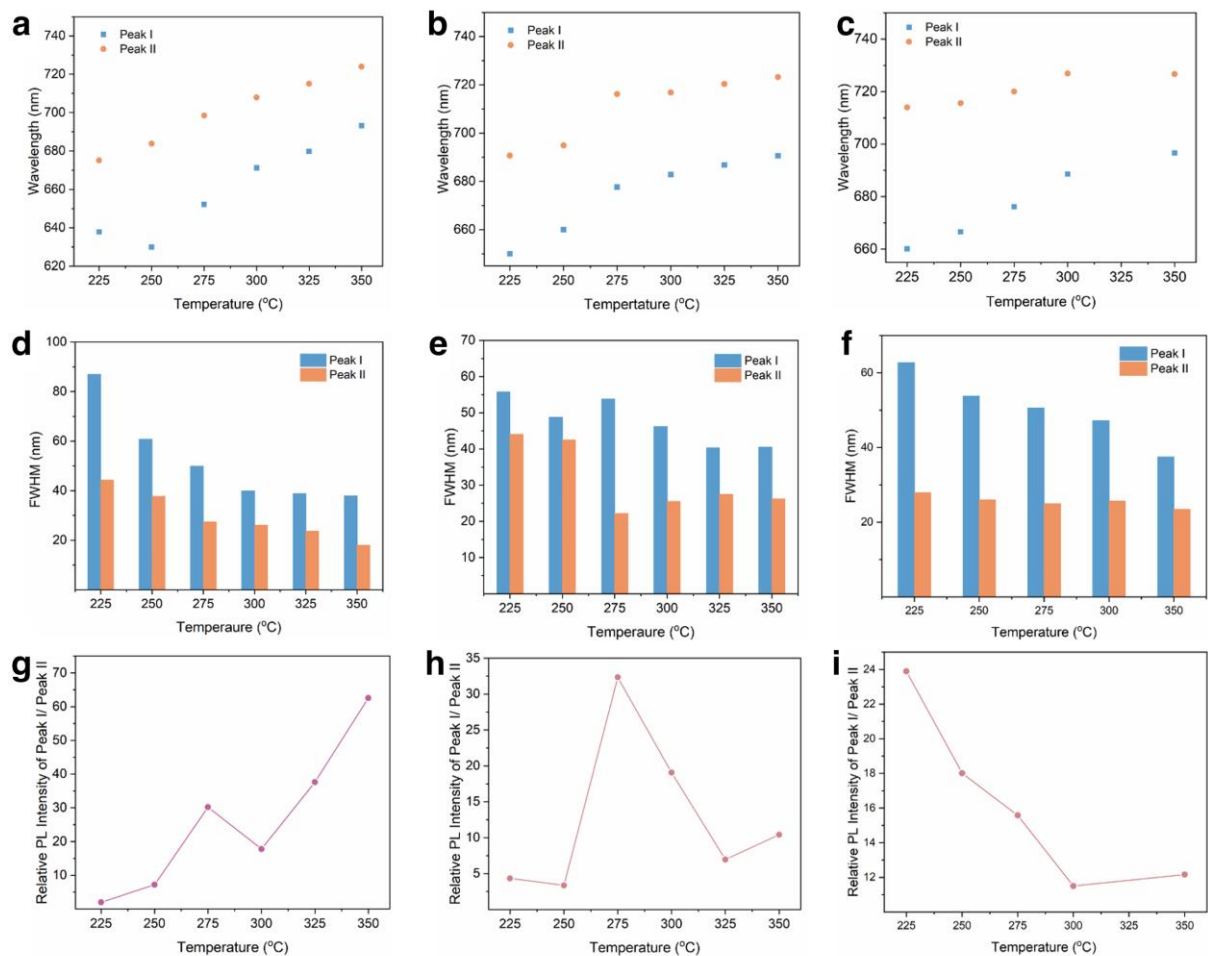

**Supplementary Fig. 15. Summary of the two-Gaussian fitting of PL, where Peak I represents the high energy peak and the Peak II represents the low energy peak.** The extracted peak positions for **a**  $(\text{CsPbI}_3)_{0.1}(\text{a}_g\text{ZIF-62})_{0.9}$ , **b**  $(\text{CsPbI}_3)_{0.25}(\text{a}_g\text{ZIF-62})_{0.75}$  and **c**  $(\text{CsPbI}_3)_{0.40}(\text{a}_g\text{ZIF-62})_{0.60}$  composites. The summary of peak bandwidths from **d**  $(\text{CsPbI}_3)_{0.1}(\text{a}_g\text{ZIF-62})_{0.9}$ , **e**  $(\text{CsPbI}_3)_{0.25}(\text{a}_g\text{ZIF-62})_{0.75}$  and **f**  $(\text{CsPbI}_3)_{0.40}(\text{a}_g\text{ZIF-62})_{0.60}$  composites. The relative intensity of Peak I and Peak II from **g**  $(\text{CsPbI}_3)_{0.1}(\text{a}_g\text{ZIF-62})_{0.9}$ , **h**  $(\text{CsPbI}_3)_{0.25}(\text{a}_g\text{ZIF-62})_{0.75}$  and **i**  $(\text{CsPbI}_3)_{0.40}(\text{a}_g\text{ZIF-62})_{0.60}$  composites.

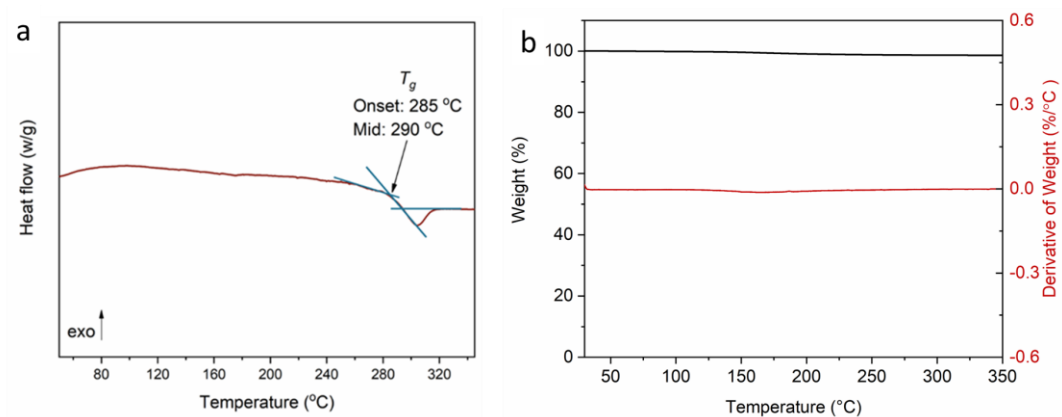

**Supplementary Fig. 16. DSC and TGA results upon sintering to  $350^{\circ}\text{C}$ . Data was collected under constant flowing nitrogen ( $20\text{ mL/min}$ ). a DSC results for melt-quenched  $a_g\text{ZIF-62}$  and b TGA results for  $(\text{CsPbI}_3)(a_g\text{ZIF-62})(40/60)$ . The temperature ramp rate was  $20^{\circ}\text{C/min}$ .**

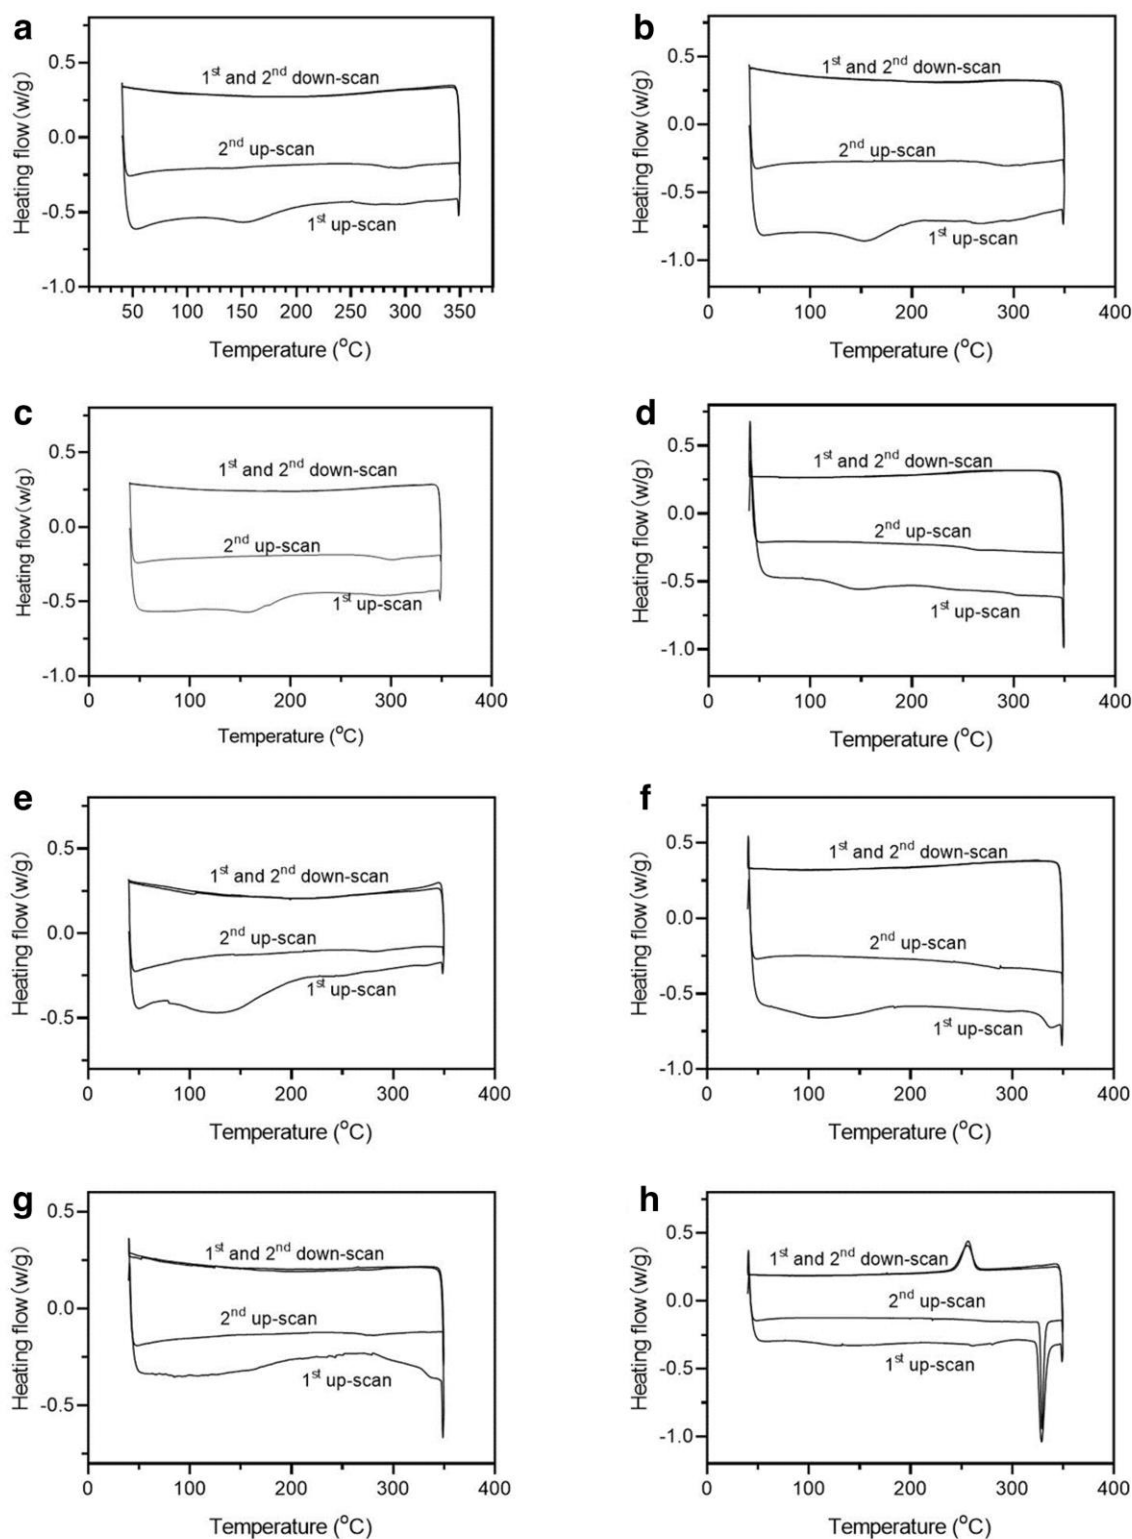

**Supplementary Fig. 17. DSC data of  $(\text{CsPbI}_3)_x(\text{agZIF-62})_y$  composites with different  $\text{CsPbI}_3$  loadings. a**  $\text{CsPbI}_3)_{0.01}(\text{agZIF-62})_{0.99}$ , **b**  $(\text{CsPbI}_3)_{0.05}(\text{agZIF-62})_{0.95}$ , **c**  $(\text{CsPbI}_3)_{0.10}(\text{agZIF-62})_{0.90}$ , **d**  $(\text{CsPbI}_3)_{0.25}(\text{agZIF-62})_{0.75}$ , **e**  $\text{CsPbI}_3)_{0.40}(\text{agZIF-62})_{0.60}$ , **f**  $\text{CsPbI}_3)_{0.50}(\text{agZIF-62})_{0.50}$ , **g**  $\text{CsPbI}_3)_{0.55}(\text{agZIF-62})_{0.45}$  and **h**  $\text{CsPbI}_3)_{0.75}(\text{agZIF-62})_{0.25}$  composites. The temperature ramping rate for the first up-scan was 20 °C/min, and the ramping rate was 10 °C/min during the DSC cooling and second up-scan.

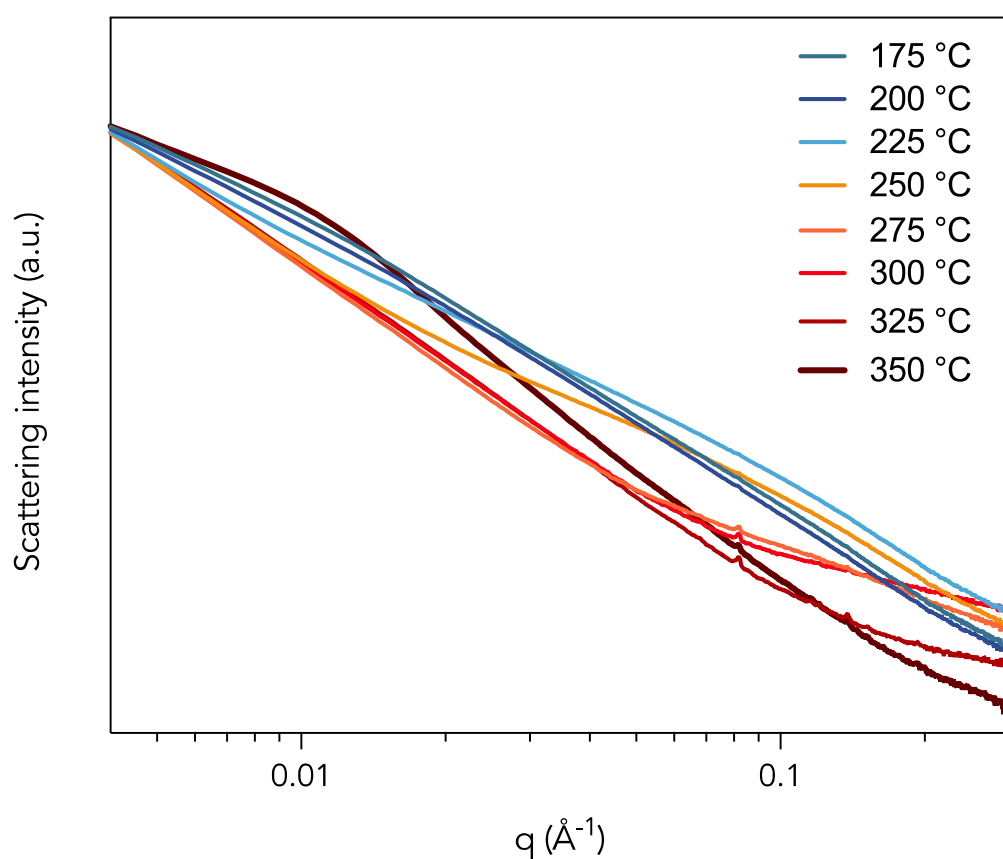

**Supplementary Fig. 18.** *Ex-situ* synchrotron small angle scattering (SAXS) of  $(\text{CsPbI}_3)_{0.1}(\text{agZIF-62})_{0.9}$  fabricated with different sintering temperatures. The spike at *ca.*  $0.08 \text{ \AA}^{-1}$  is attributed to the detector configuration.



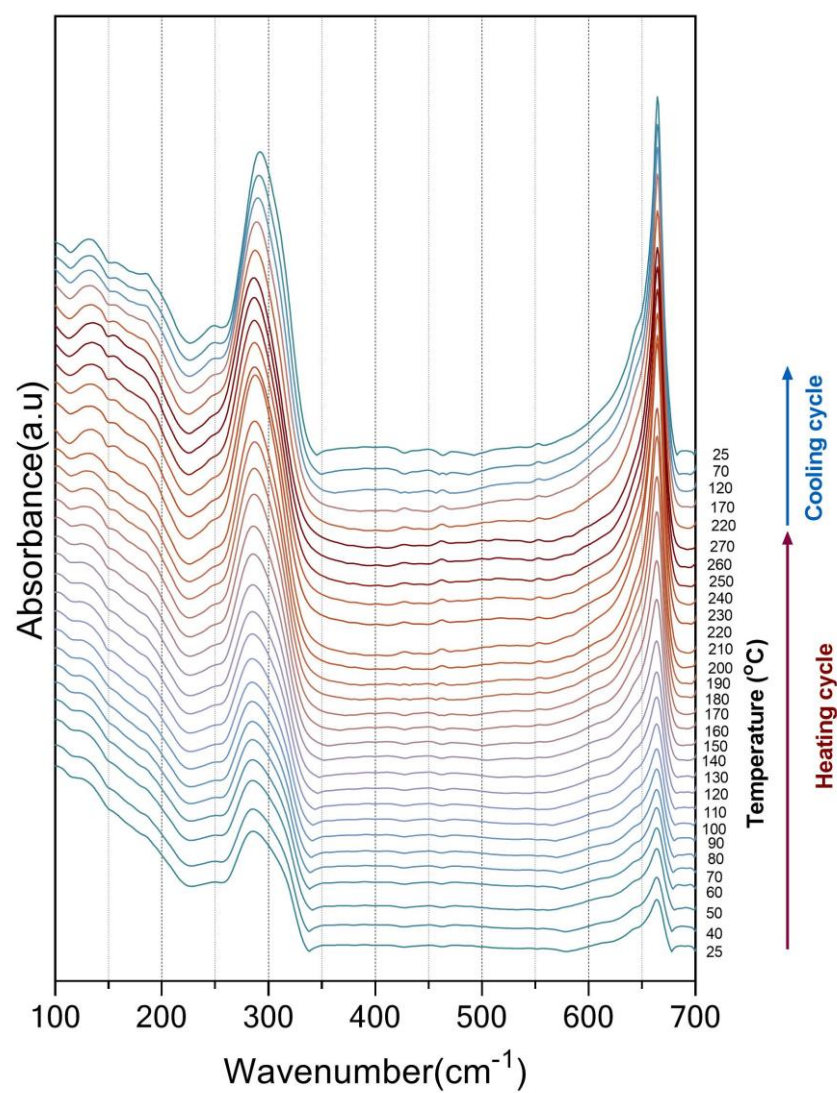

**Supplementary Fig. 19.** Temperature-resolved *in-situ* THz FarIR spectra for  $(\text{CsPbI}_3)_x(\text{a}_g\text{ZIF-62})_{1-x}$  composites during heating and cooling ramps. Ramp rate was  $10^{\circ}\text{C}/\text{min}$ .

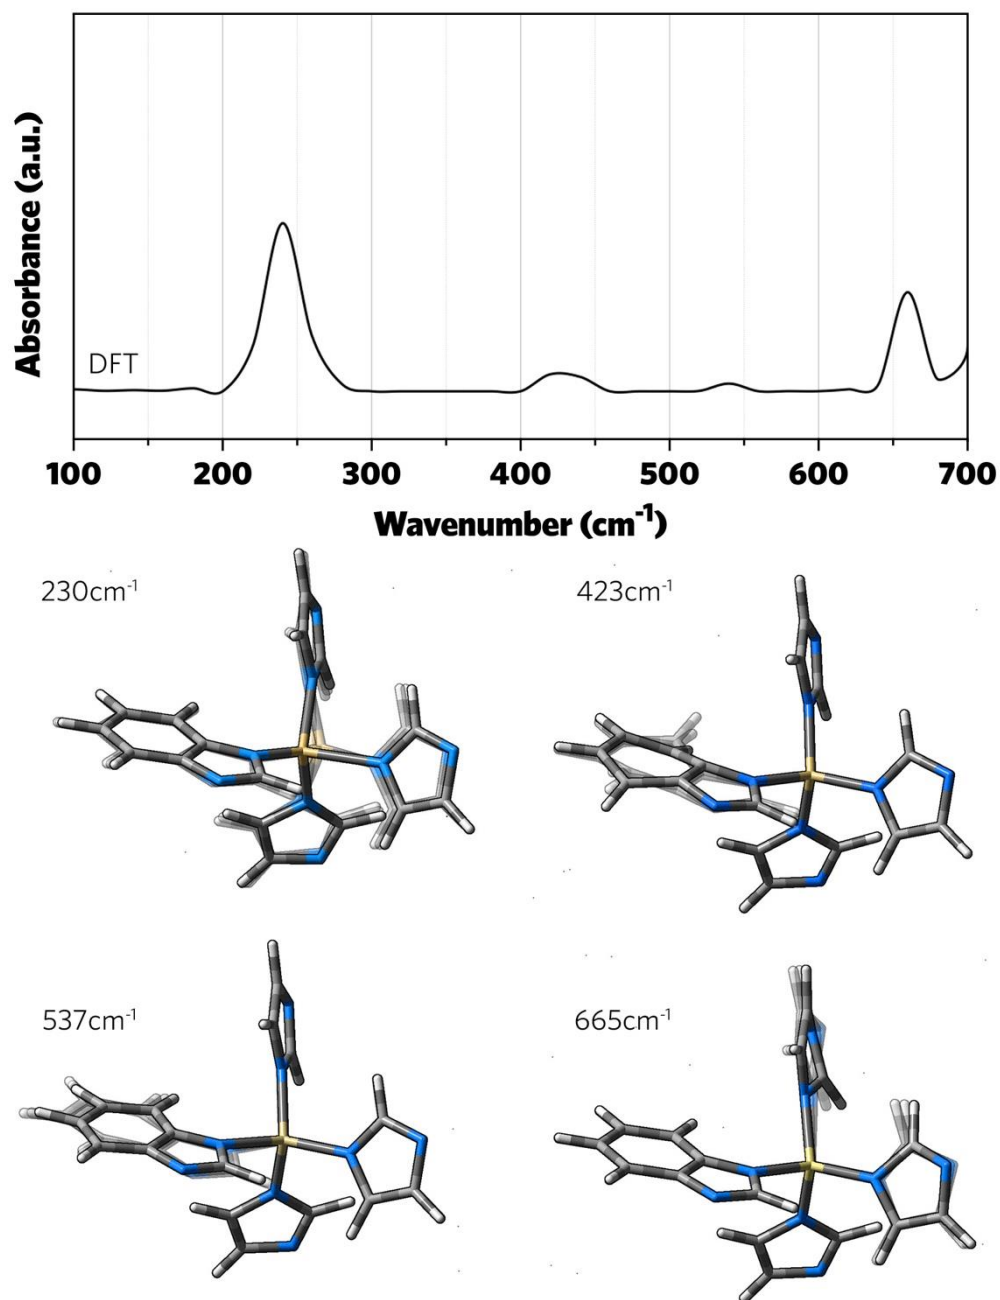

**Supplementary Fig. 20.** DFT calculations of the ZIF-62 THz absorbance spectrum. The scheme represents the vibration and deformation movement of the corresponding features. More detailed DFT calculation procedures can be found in our previous publication<sup>2</sup>.

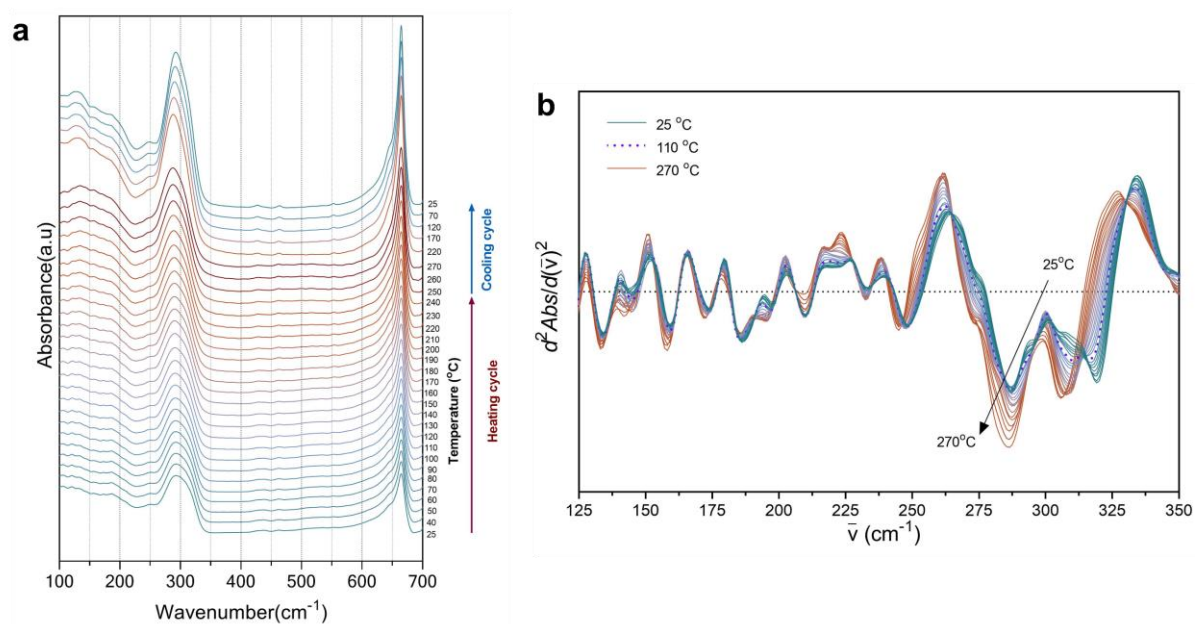

**Supplementary Fig. 21. a** Temperature-resolved *in-situ* THz FarIR spectra for  $(\text{CsPbI}_3)(\text{a}_g\text{ZIF-62})(1/99)$  composites and **b** corresponding second derivative spectra. The sample were heated to 270 °C and cooling back to room temperature under Ar protections.

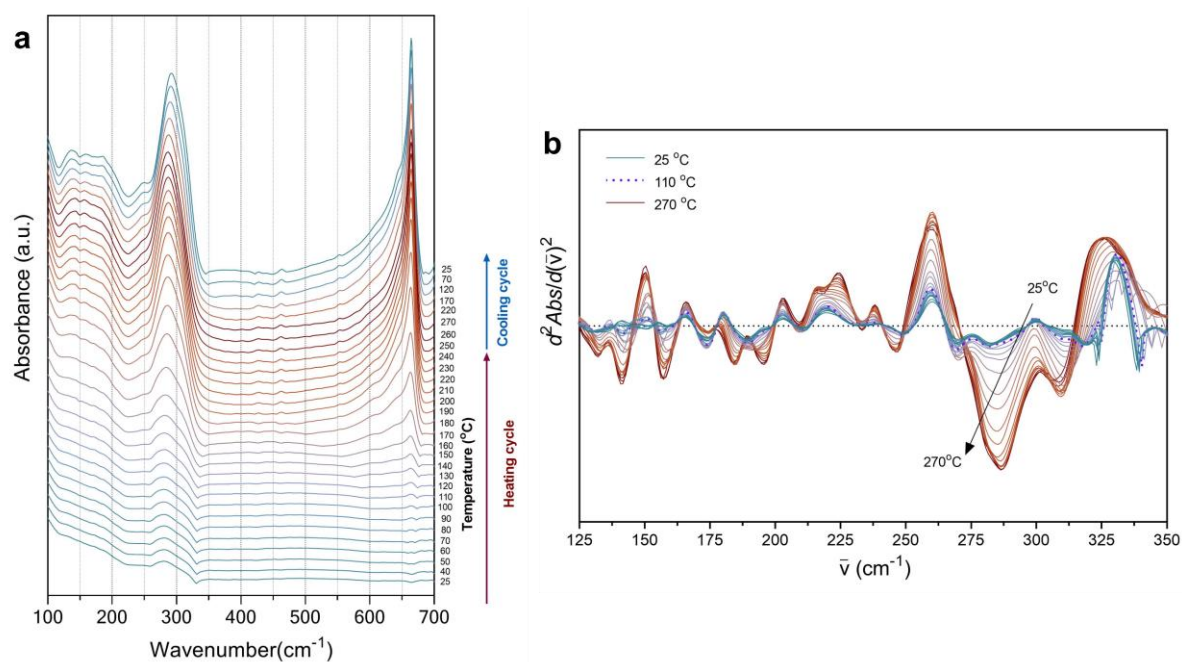

**Supplementary Fig. 22. a** Temperature-resolved *in-situ* THz FarIR spectra for  $(\text{CsPbI}_3)(\text{a}_9\text{ZIF-62})(25/75)$  composites and **b** corresponding second derivative spectra. The sample were heated to 270 °C and cooling back to room temperature under Ar protections.

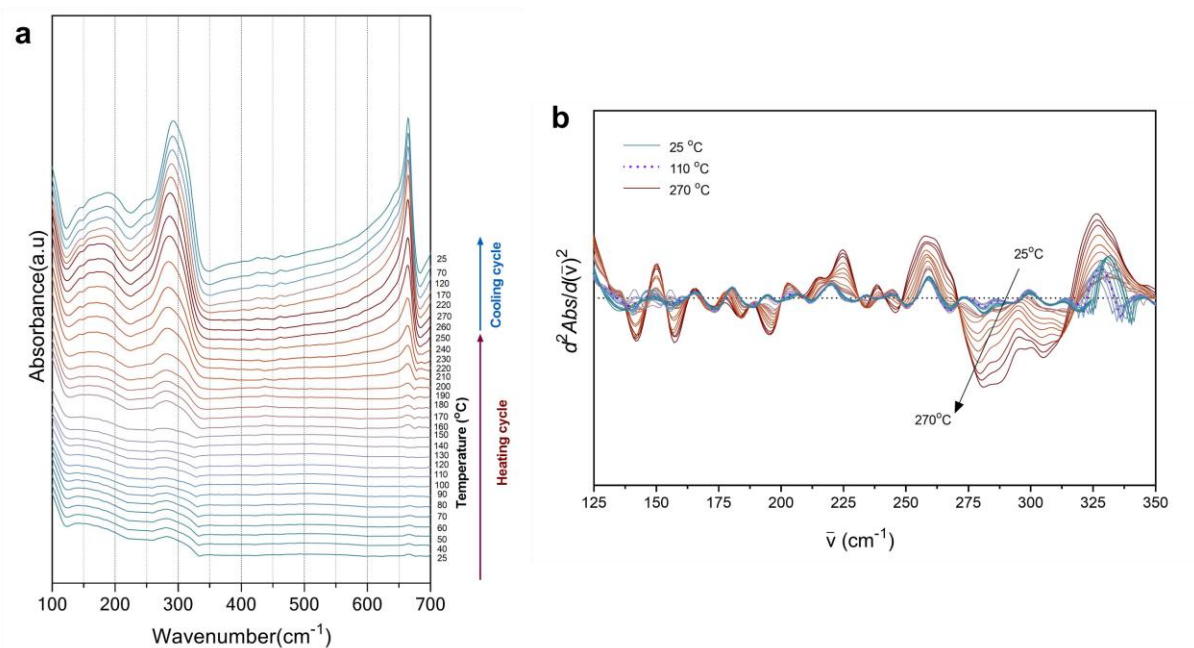

**Supplementary Fig. 23. a** Temperature-resolved *in-situ* THz FarIR spectra for  $(\text{CsPbI}_3)(\text{agZIF-62})(55/45)$  composites and **b** corresponding second derivative spectra. The sample were heated to 270 °C and cooling back to room temperature under Ar protections.

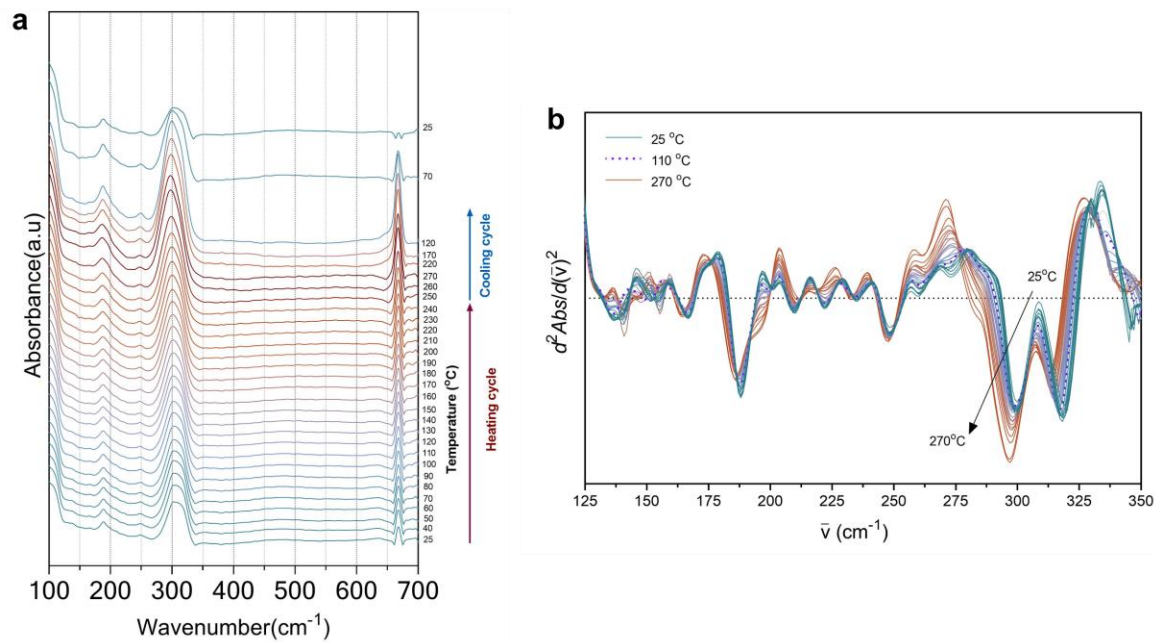

**Supplementary Fig. 24. a** Temperature-resolved *in-situ* THz FarIR spectra for  $(\text{CsPbI}_3)(\text{a}_6\text{ZIF-62})(85/15)$  composites and **b** corresponding second derivative spectra. The sample were heated to 270 °C and cooling back to room temperature under Ar protections.



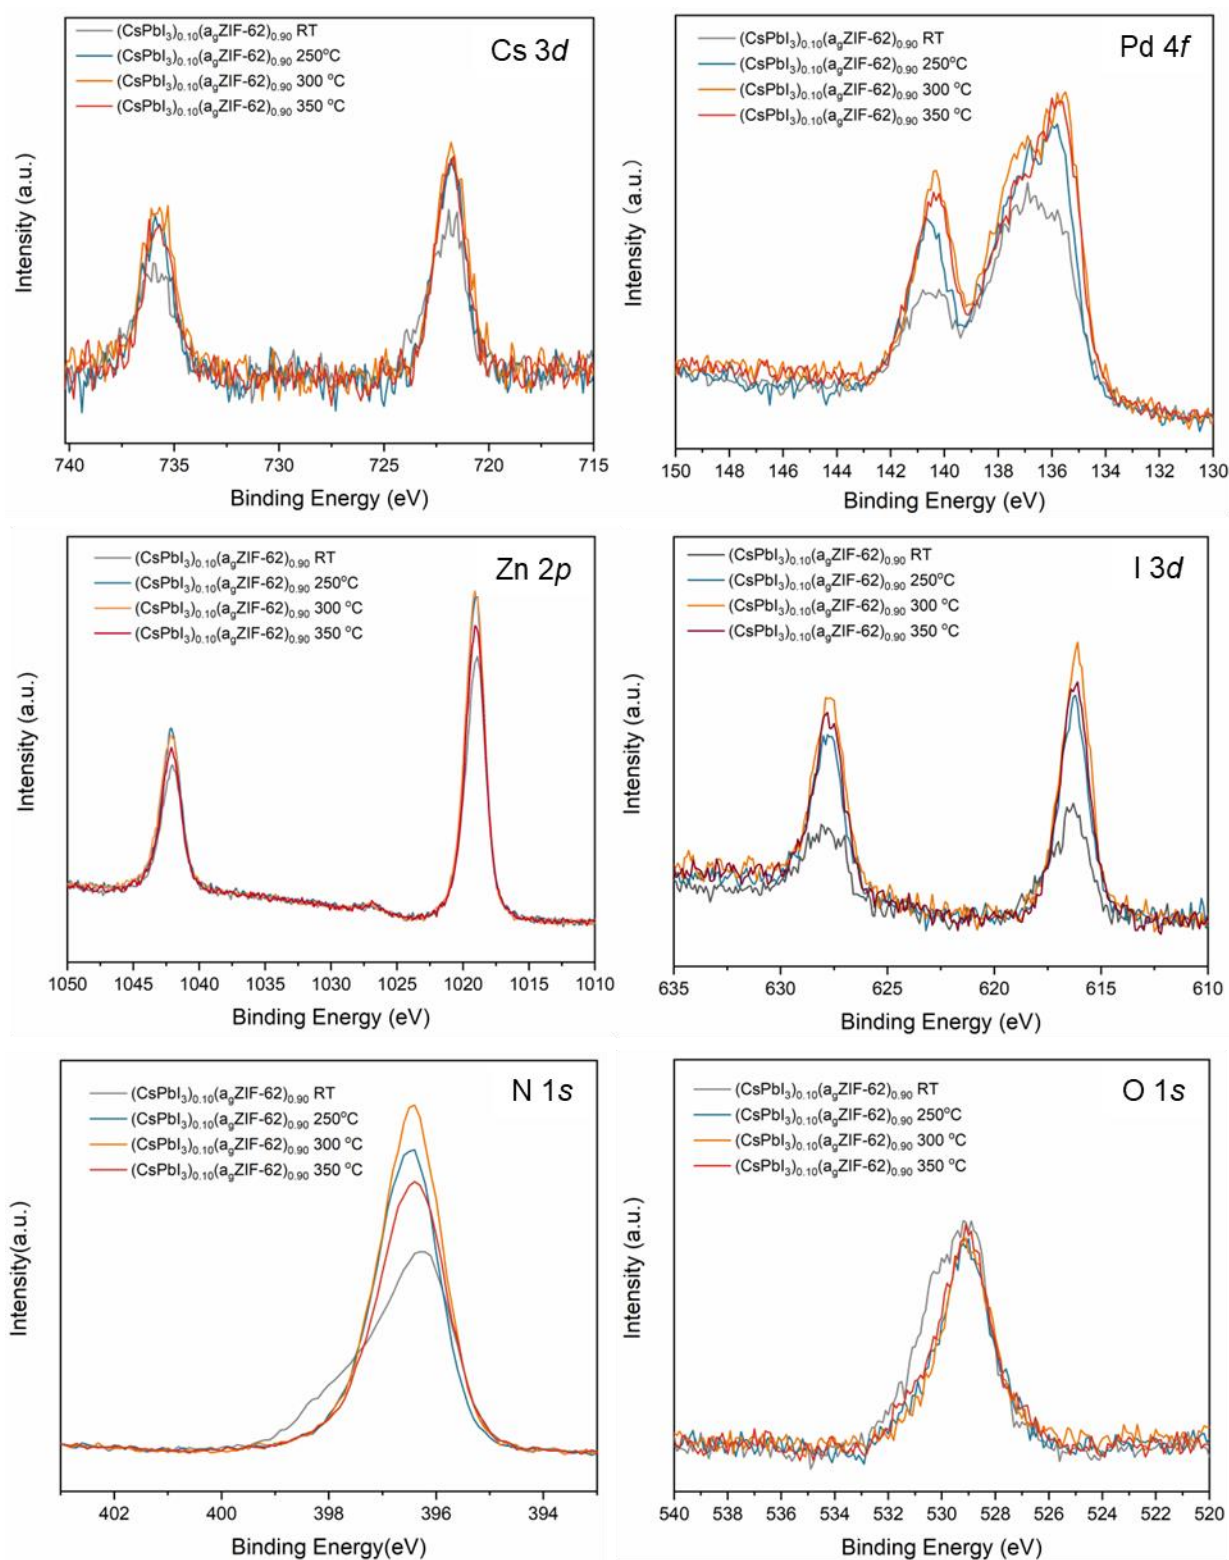

**Supplementary Fig. 25.** X-ray photoelectron spectroscopy (XPS) of  $(\text{CsPbI}_3)_{0.1}(\text{agZIF-62})_{0.9}$  composites at different sintering temperatures.

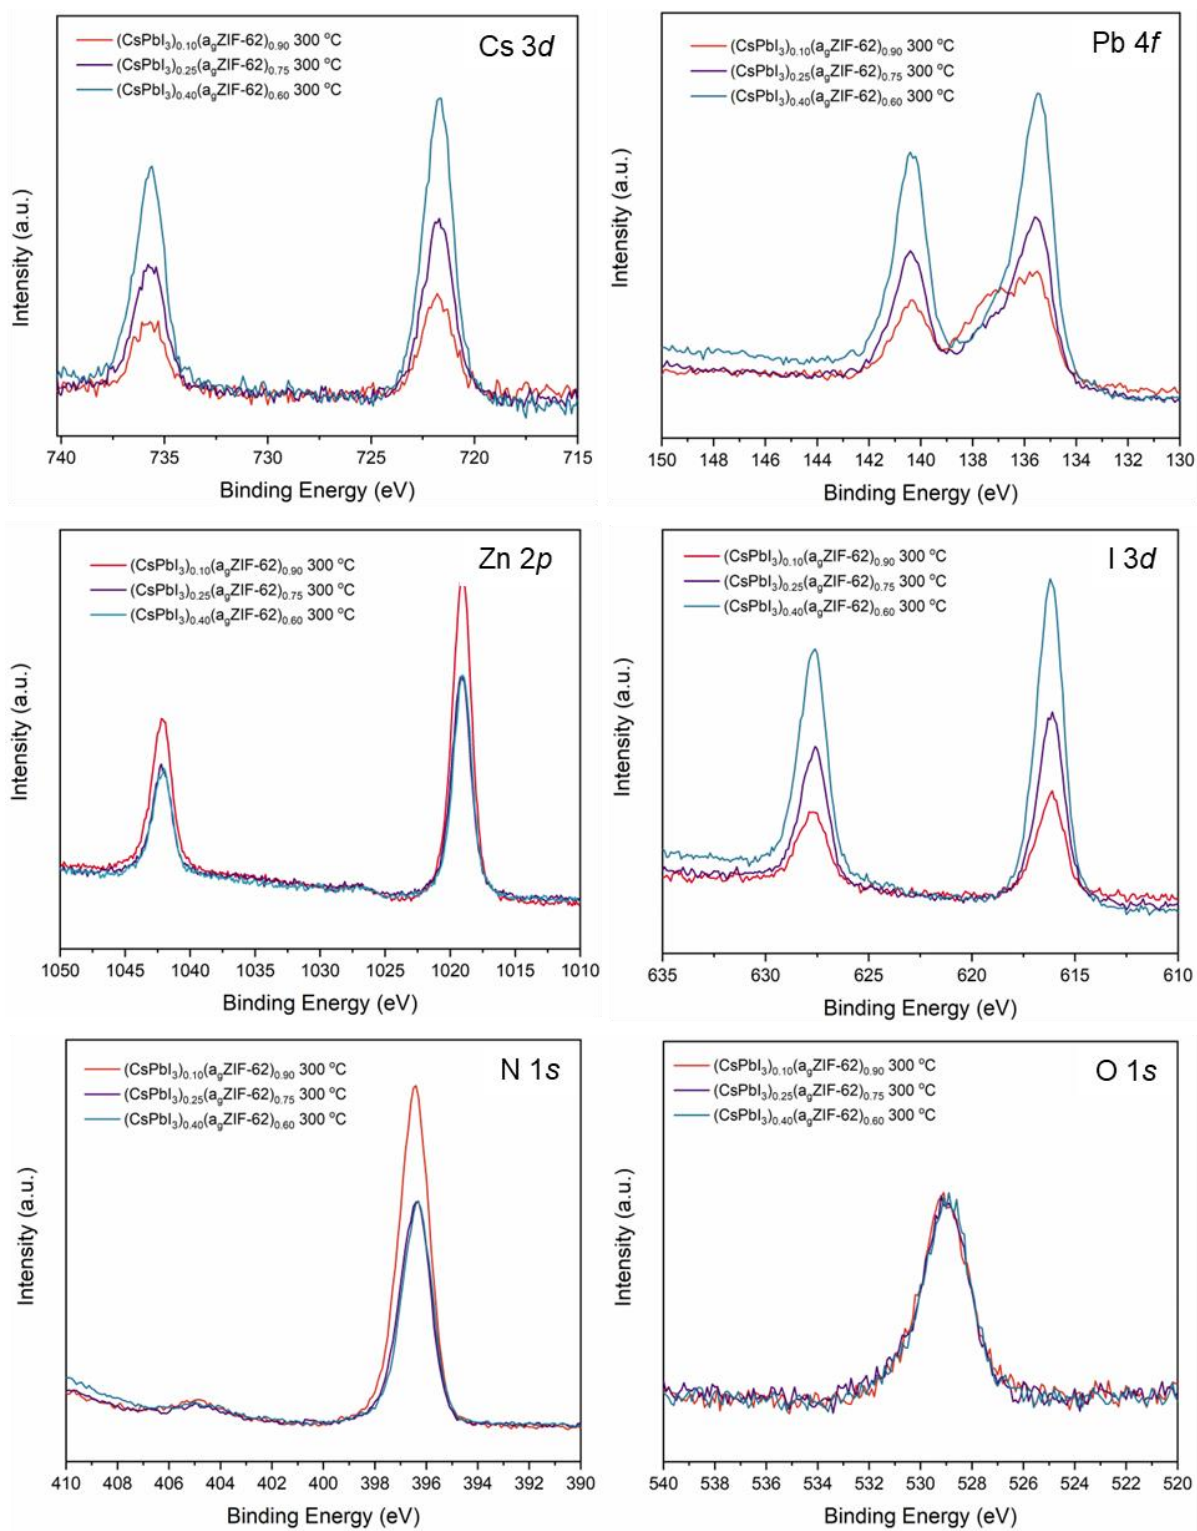

**Supplementary Fig. 26.** X-ray photoelectron spectroscopy (XPS) of  $(\text{CsPbI}_3)_x(\text{agZIF-62})_y$  composites sintering at 300 °C with different components.

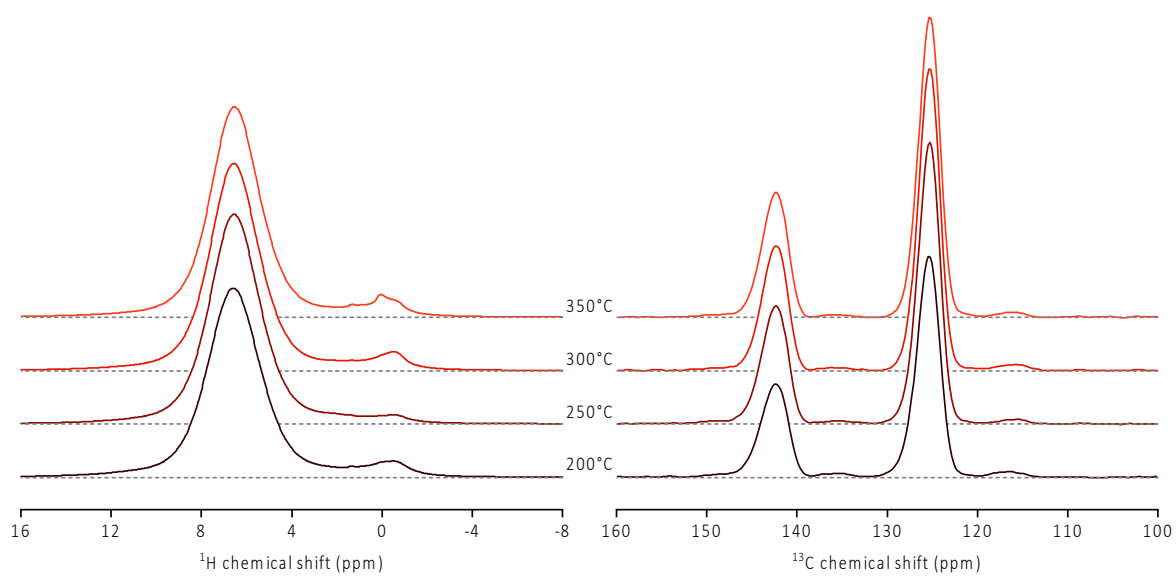

**Supplementary Fig. 27.**  $^1\text{H}$  and  $^{13}\text{C}$  MAS NMR spectra of  $(\text{CsPbI}_3)_{0.25}(\text{agZIF-62})_{0.75}$  composites sintered at 200, 250, 300, and 350 °C.

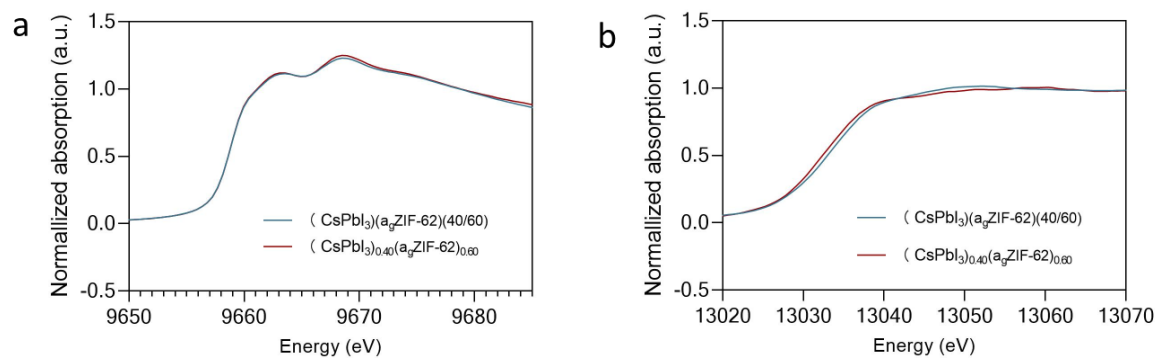

**Supplementary Fig. 28. X-ray absorption of 40 wt% CsPbI<sub>3</sub> / a<sub>9</sub>ZIF-62 composites prior and after 350 °C sintering. a** Zn K edge X-ray absorption spectrum near edge structure (XANES) and **b** Pb L<sub>3</sub>-edge XANES.

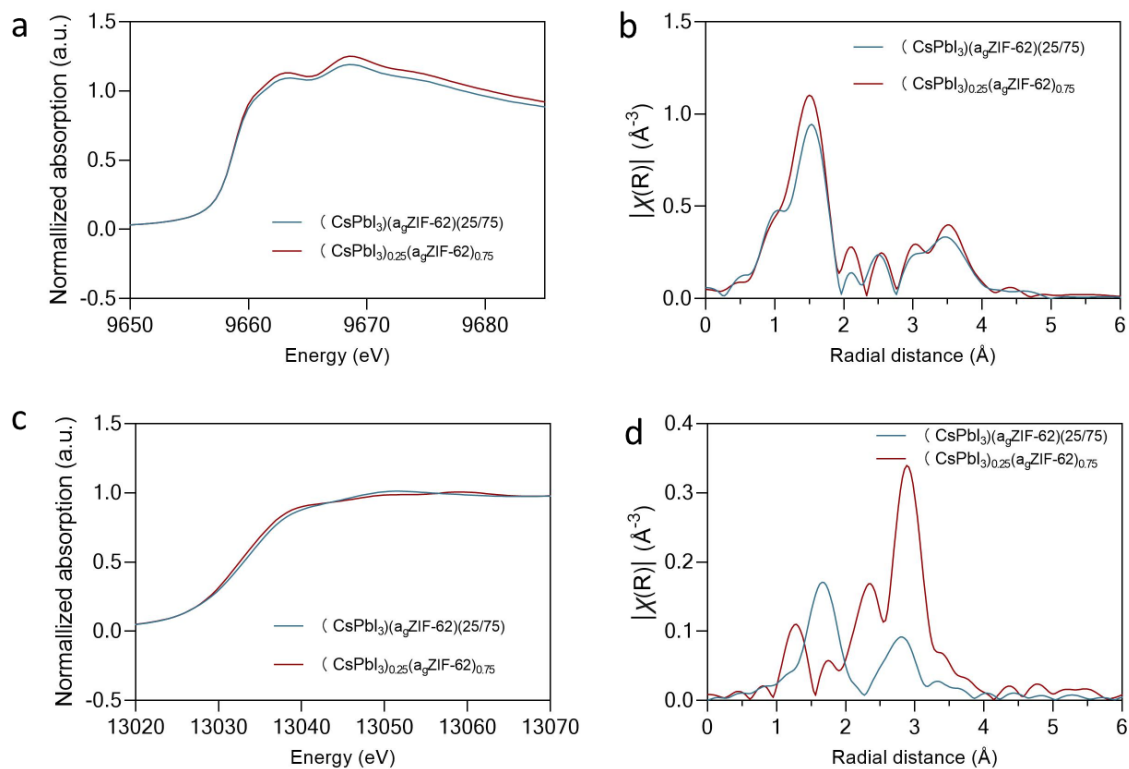

**Supplementary Fig. 29. X-ray absorption of 25 wt%  $\text{CsPbI}_3$  /  $\text{a}_g\text{ZIF-62}$  composites prior and after 350 °C sintering.** **a** Zn edge X-ray absorption spectrum near edge structure (XANES) and **b** correspondent phase-uncorrected moduli of the Fourier transform results. **c** Pb edge X-ray absorption spectrum near edge structure (XANES) and **d** correspondent phase-uncorrected moduli of the Fourier transform results.

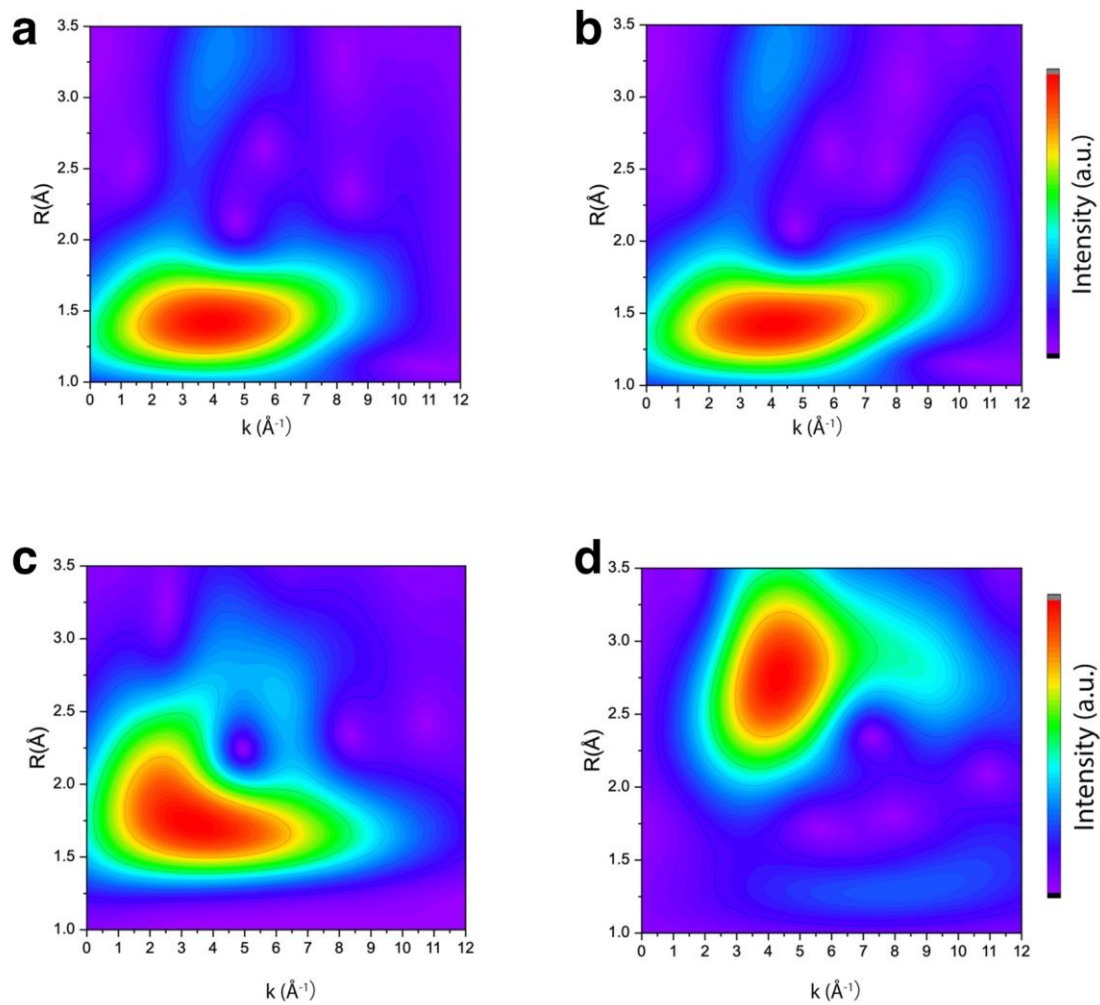

**Supplementary Fig. 30.** Full-range wavelet transform representation of the EXAFS signal for the  $(\text{CsPbI}_3)_{0.25}(\text{agZIF-62})_{0.75}$  composites. **a** Zn and **c** Pb represent the sample prior to sintering, and **b** Zn and **d** Pb represent the sample after 350 °C sintering.



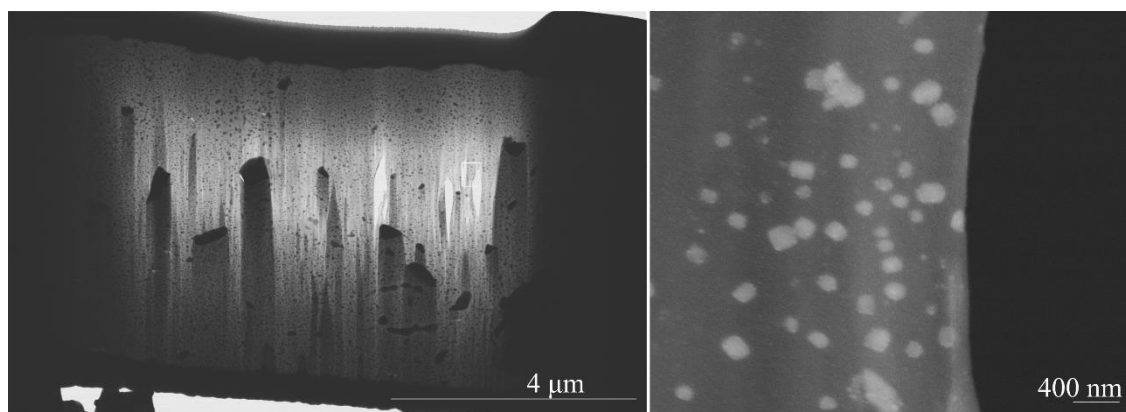

**Supplementary Fig. 31. FIB-SEM images for  $(\text{CsPbI}_3)_{0.25}(\text{agZIF-62})_{0.75}$  composites sintering 350 °C.**

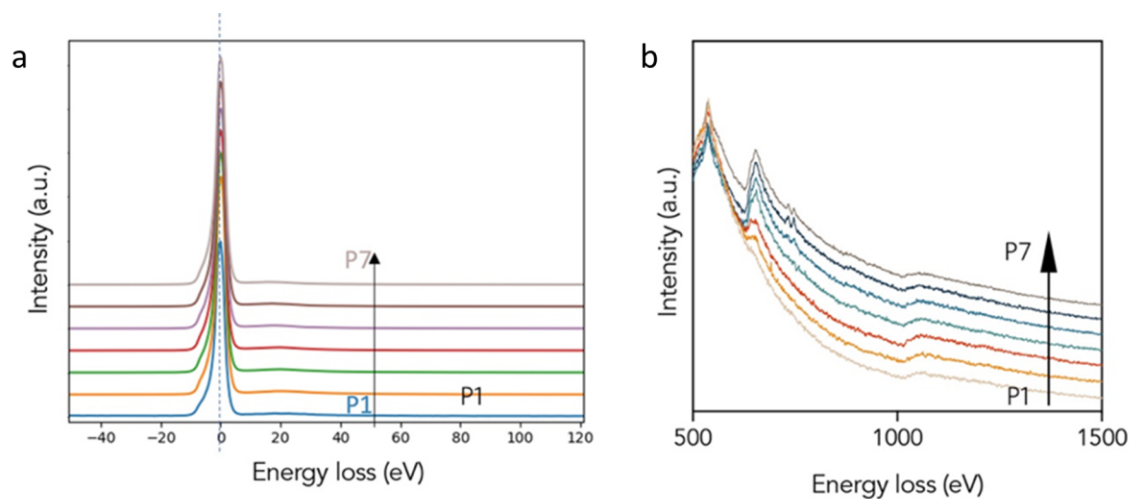

**Supplementary Fig. 32. Data processing to for the TEM-EELS results of  $(\text{CsPbI}_3)_{0.1}(\text{agZIF-62})_{0.9}$  composites sintered at 350 °C. **a** Zero loss peak: normalised to total low loss scattering (plot with Y-offsets) and **b** Core loss: Normalised to total core loss scattering (plot with Y-offsets)**

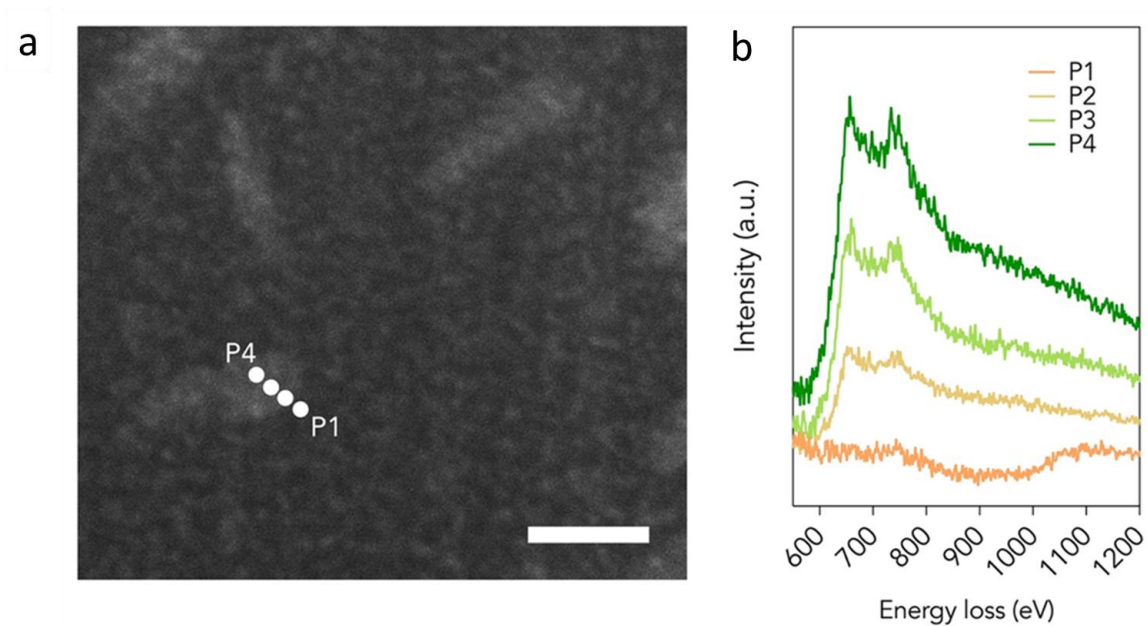

**Supplementary Fig. 33. a** Bright field STEM image of  $(\text{CsPbI}_3)_{0.1}(\text{agZIF-62})_{0.9}$  composites sintered at 275 °C. Scale bar, 50 nm. **b** EELS spectrum acquired from the marked points shown in TEM image.

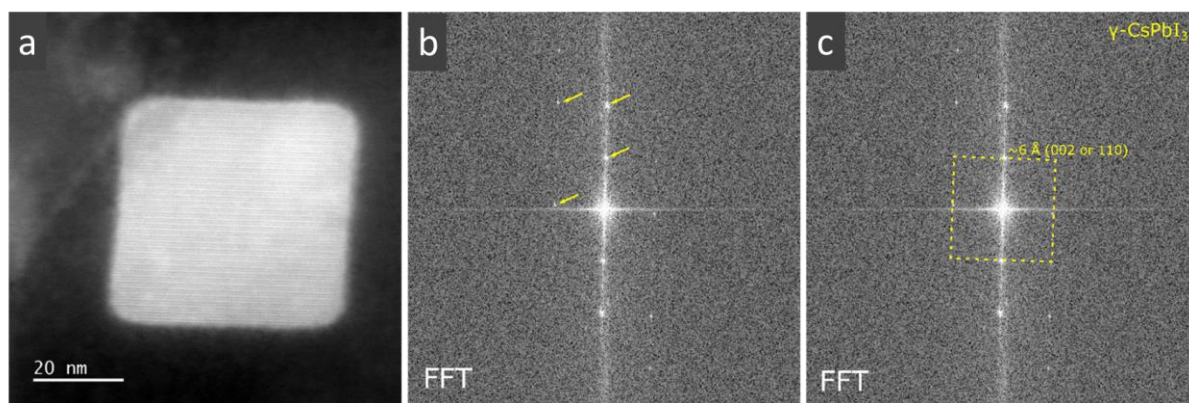

**Supplementary Fig. 34.** **a** Lattice-resolved ADF-STEM image of a FIB lamella showing a CsPbI<sub>3</sub> nanocrystal in a<sub>g</sub>ZIF-62. **b, c** The fast Fourier transform (FFT) of the crystal image was indexed to γ-CsPbI<sub>3</sub> based on the approximately square pattern of spots at ~6 Å (real-space spatial frequency). Annotations in yellow highlight the position of spots and their approximately square symmetry.

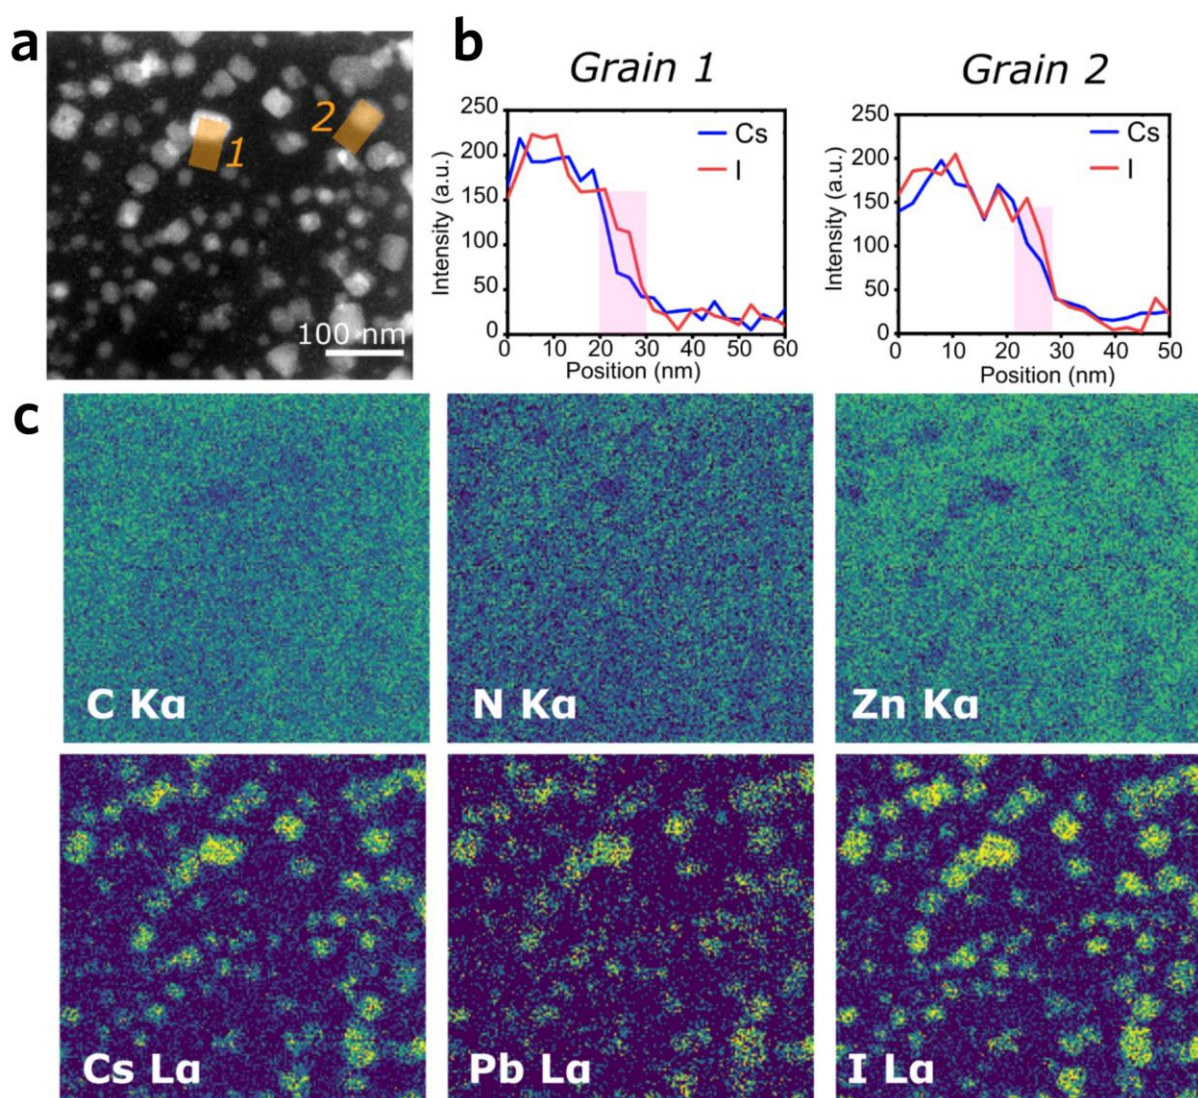

**Supplementary Fig. 35. STEM-EDS analysis of CsPbI<sub>3</sub> nanocrystals in agZIF-62.** **a** An overview ADF-STEM micrograph and **b** corresponding line profiles marked in orange. The line profiles show the Cs L $\alpha$  and I L $\alpha$  X-ray intensity at selected grains. The I L $\alpha$  intensity extends further with the Cs L $\alpha$  intensity decaying faster (magenta shaded regions), corroborating the ~5-10 nm further extension of I intensity observed in EELS beyond the detection of Cs in the nanocrystals. **c** EDS maps showing the major constituents of agZIF-62 (C, N, Zn) and CsPbI<sub>3</sub>.

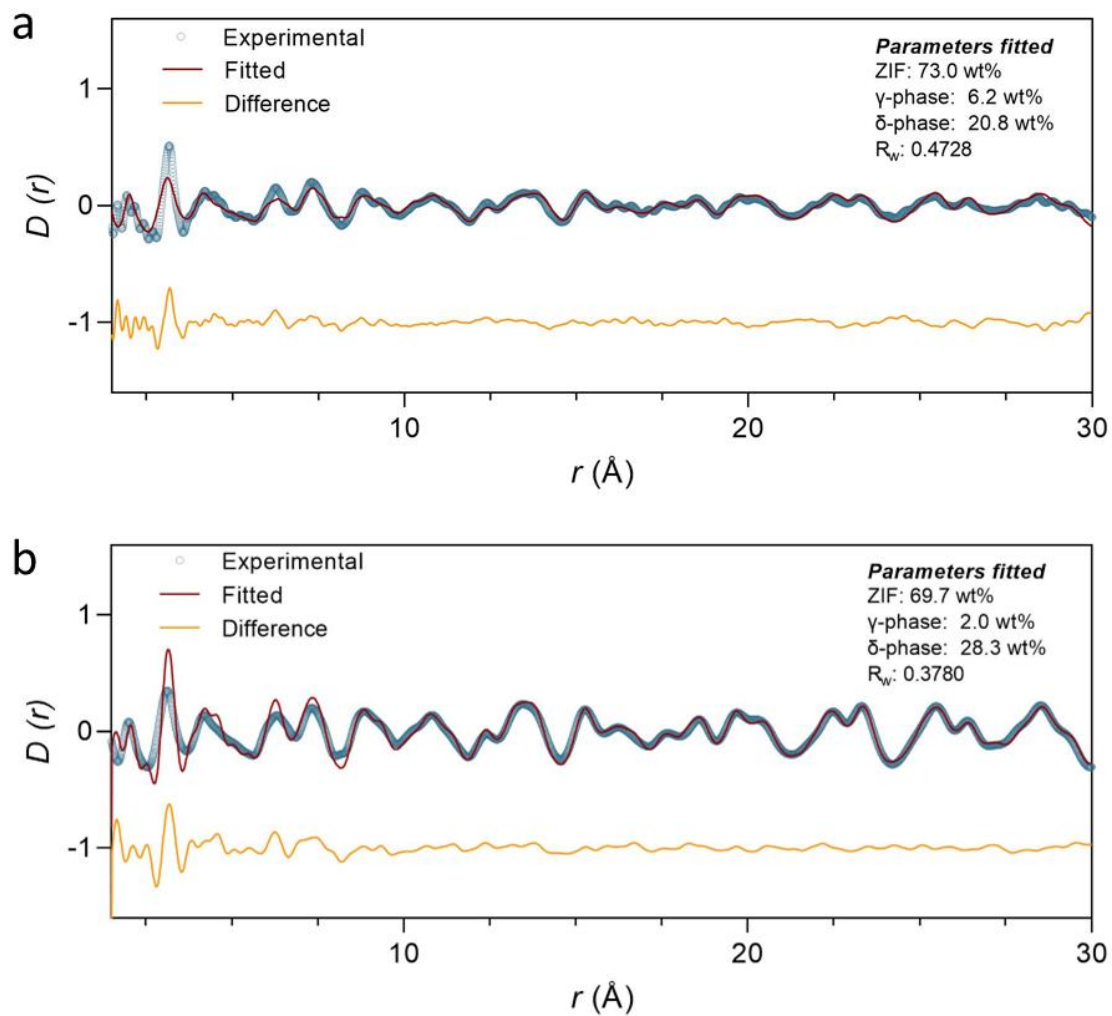

**Supplementary Fig. 36.** Atomic pair distribution functions for  $(\text{CsPbI}_3)_{0.40}(\text{agZIF-62})_{0.60}$  composites sintered at **a** 325 and **b** 350 °C. Pair distribution function  $D(r)$  calculated *via* Fourier transform of the X-ray total scattering function.



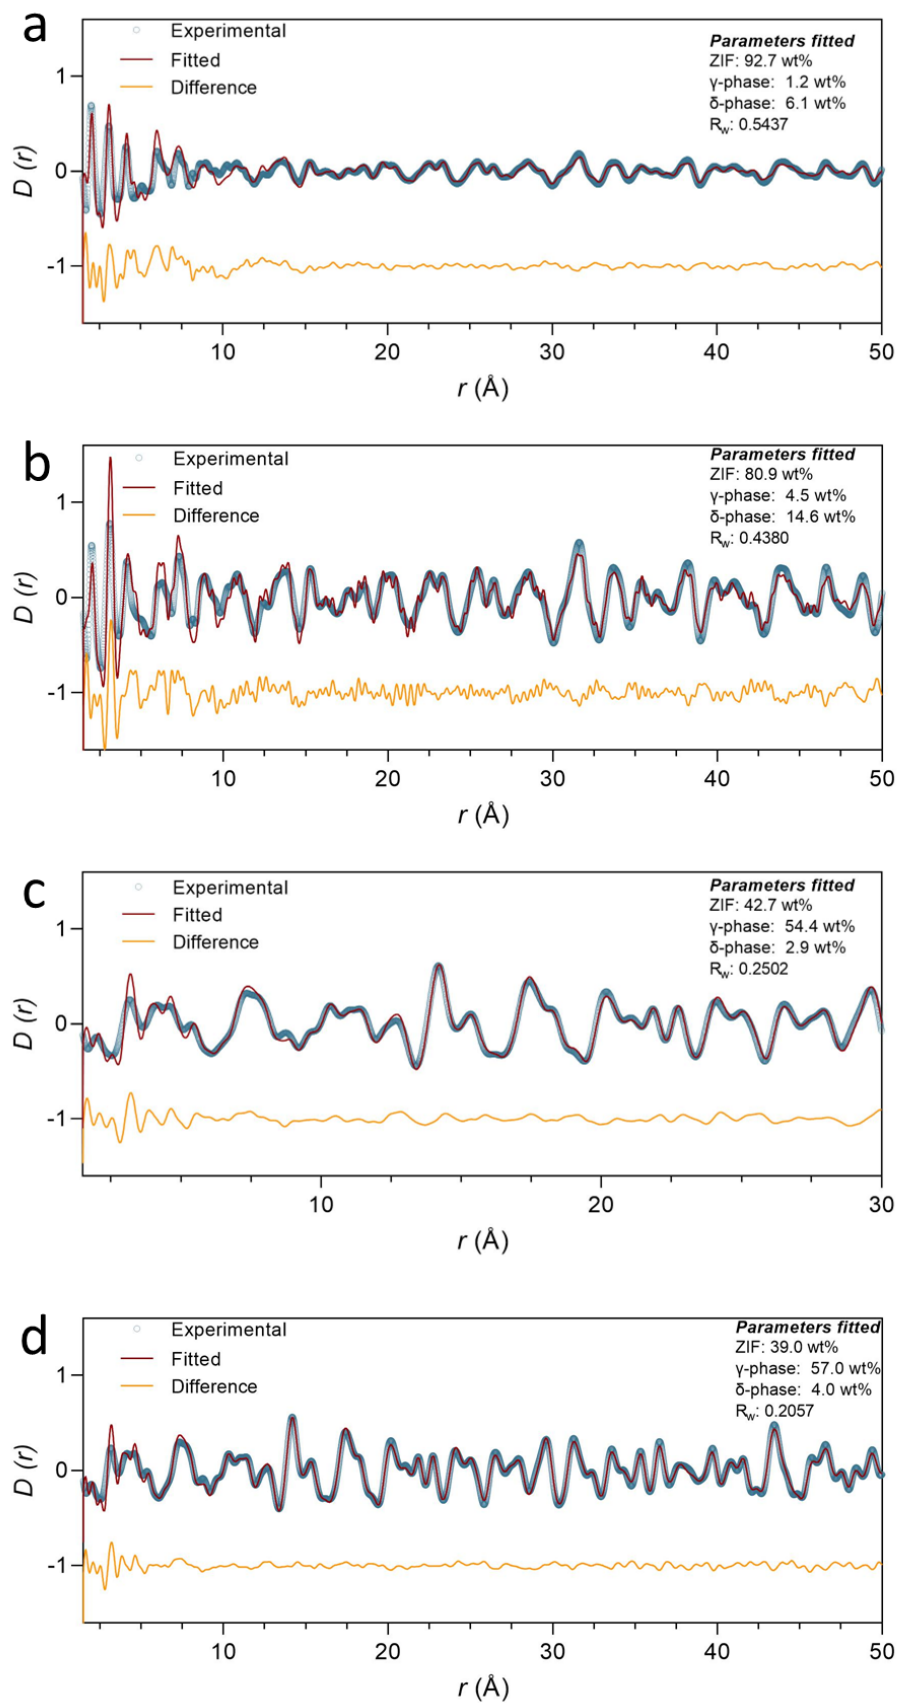

**Supplementary Fig. 37.** Atomic pair distribution functions for composite sintered at 350 °C with different CsPbI<sub>3</sub> loadings. **a** 10 wt%, **b** 25 wt%, **c** 70 wt% and **d** 85 wt%.



## Supplementary References

- 1 Marronnier, A. *et al.* Anharmonicity and Disorder in the Black Phases of Cesium Lead Iodide Used for Stable Inorganic Perovskite Solar Cells. *ACS Nano* **12**, 3477-3486 (2018).
- 2 Hou, J. *et al.* Halogenated Metal-Organic Framework Glasses and Liquids. *J Am Chem Soc* **142**, 3880-3890 (2020).
